# Supplementary material for: Exposure trials in built heritage research: Review and prospect
Source: Research Square preprint supplement (doi:10.21203/rs.3.rs-7439371/v1), 2025-10-13
Supplement: Supplementary file 1 [file db9d9c4bd9baf081ab0239a3.xlsx]

## Sheet: Data_ALL
PURPOSE			REFERENCE				SUBSTRATE																																									EXPOSURE
							Stone types								Objective of the exposure											Type of treatment			Specimens details																	Lab controls	Lab accelerated ageing	Exposure design
Drivers	Treatments	Bio	Reference	DOI (if available)	Year of publication	Exposure program name	Limestone	Dolostone	Sandstone	Marble	Granite	Stone: Other	Stone names	Number of different substrates	Weathering: overall mechanisms	Weathering: wet deposition and surface recession	Weathering: dry deposition and soiling	Treatment: Surface protection	Treatment: Consolidation	Treatment: Biocides	Treatment: Anti-graffiti	Bio: Bioreceptivity	Bio: Biodeterioration	Bio: Bioprotection	Other	Treatment product: class	Treatment product: commercial	Treatment product: experimental	Geometry #1 (mm): length	Geometry #1 (mm): width	Geometry #1 (mm): height	Geometry #2 (mm): length	Geometry #2 (mm): width	Geometry #2 (mm): height	Geometry #3 (mm): length	Geometry #3 (mm): width	Geometry #3 (mm): height	Geometry #4 (mm): length	Geometry #4 (mm): width	Geometry #4 (mm): height	N. of different specimens geometries	Geometry (mm): non standard - max dimension	Preparation	Pre-treatment	N. of replicas			Exposure rack	Test wall
YES	YES	NO	Vleugels, G. J., et al. (1991). Study of the weathering of bare and treated limestones in ambient atmospheric conditions. Science, Technology and European Cultural Heritage and Torfs, K. and R. Van Grieken (1996). "Effect of stone thickness on run-off water composition and derived damage functions in ambient exposure experiments." Atmospheric Environment 30(1): 1-8.	10.1016/B978-0-7506-0237-2.50122-2	1991		YES	NO	NO	NO	NO	NO	Balegem; Gobertange; Massangis	3	NO	YES	YES	YES	NO	NO	NO	NO	NO	NO		Siloxane	YES	NO	250	250	50	50	50	50	250	125	10				3				3	NO	NO	YES	NO
YES	YES	NO	Vleugels, G. J., et al. (1991). Study of the weathering of bare and treated limestones in ambient atmospheric conditions. Science, Technology and European Cultural Heritage	10.1016/B978-0-7506-0237-2.50122-2	1991		YES	NO	NO	NO	NO	NO	Balegem; Gobertange; Massangis	3	NO	YES	YES	YES	NO	NO	NO	NO	NO	NO		Siloxane	YES	NO	250	250	50	50	50	50							2				3	NO	NO	YES	NO
NO	YES	NO	Baronio, G., et al. (1996). Full scale models as an outdoor laboratory to study the durability of surface treatments. 8th International Congress on Deterioration and Conservation of Stone. J. Riederer. Berlin. 3: 1333-1344.		1996		NO	NO	YES	NO	NO	NO	Pietra Serena	1	NO	NO	NO	YES	YES	NO	NO	NO	NO	NO		Epoxy resin; acrylic resin	YES	NO													1	Small scale building-like units				NO	NO	NO	YES
NO	YES	NO	Raupach, M. and J. Brockmann (2001). Long-term studies on polymer-based impregnation agents on natural stones. Hydrophobe III. K. Littmann and E. A. Charola. Hannover: 49-60.		2001		NO	NO	YES	NO	NO	NO	Sander sandstone; Ebenheider sandstone	2	NO	NO	NO	YES	YES	NO	NO	NO	NO	NO		Polyurethane; alkyl-polysiloxane; Tetraethoxysilane; alkylsiloxane	NO	YES														Unknown, probably 15 mm cubes				NO	YES	YES	NO
NO	YES	NO	Raupach, M. and J. Brockmann (2001). Long-term studies on polymer-based impregnation agents on natural stones. Hydrophobe III. K. Littmann and E. A. Charola. Hannover: 49-60.		2001		NO	NO	YES	NO	NO	NO	Sander sandstone; Ebenheider sandstone	2	NO	NO	NO	YES	YES	NO	NO	NO	NO	NO		Polyurethane; alkyl-polysiloxane; Tetraethoxysilane; alkylsiloxane	NO	YES														Unknown, probably 15 mm cubes				NO	YES	YES	NO
NO	YES	NO	Bruchertseifer, C., et al. (1995). Long-Term Exposure of Treated Natural Stone. Development and First Results of a Testing Concept. Hydrophobe I, Delf University of Technology. Faculty of Architecture, Delft.		1995	Zollern Institute	YES	YES	YES	NO	NO	NO	Baumberger sandstone; Ruhr sandstone; Auerkalk; Burg sandstone; Rüthener green sandstone; Anröchter Dolomit; Schleeriether sandstone; Eichenbühler sandstone; Obernkirchner sandstone; Hils sandstone	10	NO	NO	NO	YES	YES	NO	NO	NO	NO	NO		Silane; Siloxane; Silicone; Tetraethoxysilane; Acrylate	YES	NO	300	300	150	50	50	5							2					YES	NO	YES	NO
NO	YES	NO	Caselli, A. and D. Kagi (1995). Methods used to evaluate the efficacy of consolidants on an Australian sandstone. International Colloquium on Methods of Evaluating Products for the Conservation of Porous Building Materials in Monuments, Rome, ICCROM.		1995		NO	NO	YES	NO	NO	NO	Bacchus Marsh sandstone	1	NO	NO	NO	YES	YES	NO	NO	NO	NO	NO		MTMOS; Tetraethoxysilane, Silane; Siloxane	YES	NO	190	140	130	270	150	140	270	150	140				3	discs (unknown size)	Drying 150°C	naturally weathered stone from the same building	5	NO	YES	YES	NO
YES	YES	YES	Young, M. E., et al. (1995). Assessment in a field setting of the efficiency of various biocides on sandstone. International Colloquium on Methods of Evaluating Products for the Conservation of Porous Building Materials in Monuments, Rome, ICCROM. and Masonry Conservation Research Group. (1995). Biological growths, biocide treatment, soiling and decay of sandstone buildings and monuments in Scotl…		1995		NO	NO	YES	NO	NO	NO	Blaxter; Cat Castle; Clashach; Corsehill; Leoch; Locharbriggs	6	YES	NO	NO	NO	NO	YES	NO	NO	NO	NO		Quaternary ammonium salts; Amines; Copper salt	YES	NO	50	50	15										1		Surface roughening (1 set)	Inoculation with mixed algal culture		NO	NO	YES	NO
YES	YES	NO	AA.VV. (1994). IDEAS: Investigations Into Devices Against Environmental Attack on Stones. A German-Brazilian Project, GKSS-Forschungszentrum Geesthacht. AND Von Plehwe-Leisen, E., et al. (1996). Climatic influences on longterm efficiency of conservation agents for stone - a German - Brazilian outdoor exposure program. 8th International Congress on Deterioration and Conservation of Stone		1996	IDEAS Project	NO	NO	YES	NO	NO	YES	Obernkirchner sandstone; Sander sandstone; Itacolomi quarzite; Congonhas soapstone	4	YES	YES	YES	YES	YES	YES	NO	NO	NO	NO	Swelling inhibitors	Tetraethoxysilane; Dimethylsiloxane; Butyl diammonium chloride	YES	NO	50	50	50										2	large prisms with one sloped surface				NO	NO	YES	NO
YES	YES	NO	Von Plehwe-Leisen, E., et al. (1996). Climatic influences on longterm efficiency of conservation agents for stone - a German - Brazilian outdoor exposure program. 8th International Congress on Deterioration and Conservation of Stone. J. Riederer. Berlin. 3: 1325-1332.		1996	IDEAS Project	NO	NO	YES	NO	NO	YES	Obernkirchner sandstone; Sander sandstone; Itacolomi quarzite; Congonhas soapstone	4	YES	YES	YES	YES	YES	YES	NO	NO	NO	NO	Swelling inhibitors	Tetraethoxysilane; Dimethylsiloxane; Butyl diammonium chloride	YES	NO	50	50	50										2	large prisms with one sloped surface				NO	NO	YES	NO
NO	YES	NO	Von Plehwe-Leisen, E., et al. (1996). Studies of Long-term Behaviour of Conservation agents and microbiological contamination on twenty years exposed treated Sandstone cubes. 8th International Congress on Deterioration and Conservation of Stone. J. Riederer. Berlin. 2: 1029-1037.		1996		NO	NO	YES	NO	NO	NO	Schlaitdorf	8	NO	NO	NO	YES	YES	NO	NO	NO	NO	NO		Tetraethoxysilane; Silicone; Aluminum stearate; Organic resin; PMMA; Silicate paint	YES	NO	40	40	40										1				1	NO	YES	YES	NO
NO	YES	NO	Cassar, J., et al. (2000). Performance testing of transparent protective coatings on Globigerina limestone. 9th International Congress on Deterioration and Conservation of Stone. V. Fassina. Venice, Elsevier Science. II: 251-261.		2000		YES	NO	NO	NO	NO	NO	Globigerina limestone	1	NO	NO	NO	YES	NO	NO	NO	NO	NO	NO		Silicone; PVAs; Acrylics; Natural oils; Siloxane; Aluminium stearate; Polyurethane	YES	NO													1	cubes				NO	YES	NO	NO
NO	YES	NO	Ferreira Pinto, A. P. and J. Delgado Rodrigues (2000). Assessment of durability of water repellents by means of exposure test. 9th International Congress on Deterioration and Conservation of Stone. V. Fassina. Venice, Elsevier Science. II: 273-285.		2000		YES	YES	NO	NO	NO	NO	Anca stone; Coimbra stone; Miocene stone; Lioz stone	4	NO	NO	NO	YES	NO	NO	NO	NO	NO	NO		Siloxane; Alkylalkoxysilane	YES	NO	50	50	20	150	150	25	150	150	25				3				2	NO	NO	YES	NO
NO	YES	NO	Vallet, J.-M. and V. Vergès-Belmin (1995). Influence de la pollution atmosphérique sur le vieillissement naturel de produits de protection de la pierre appliqués sur les monuments historiques. and Boutin, F. and L. Leroux (2000). Color and weight evolution of limestones protected by water repellents after a three-year ageing period in urban conditions. 9th International Congress on Deterioration …		2000		YES	NO	NO	NO	NO	NO	Vernon chalk; Saint-Pierre-Aigle limestone; Saint-maximin limestone	3	NO	NO	YES	YES	NO	NO	NO	NO	NO	NO		Acrylic resin; alkylpolisiloxane; Silicones; Alkylalkoxysilane; biomineralization	YES	NO	70	70	70	70	70	20							2				4	NO	NO	YES	NO
NO	YES	NO	Boutin, F. and L. Leroux (2000). Color and weight evolution of limestones protected by water repellents after a three-year ageing period in urban conditions. 9th International Congress on Deterioration and Conservation of Stone. Venice, Elsevier Science: 197-205.		2000		YES	YES	NO	NO	NO	NO	Courville limestone; Savonnieres limestone; Champagne chalk; Charentenay limestone; Jaumont limestone; Langres limestone; Gaize d'Argonne sandstone	7	NO	NO	YES	YES	NO	YES	NO	NO	NO	NO		Acrylic resin; alkylpolisiloxane; Silicones; Alkylalkoxysilane; biomineralization	YES	NO	70	70	70	70	70	20	70	70	20				3				4	NO	NO	YES	NO
YES	YES	NO	Young, M., et al. (2003). Chemical consolidants and water repellents for sandstones in Scotland. Edinburgh, Historic Scotland.		2003		NO	NO	YES	NO	NO	NO	Cat Castle; Clashach; Leoch; Locharbriggs; Stainton; Unknown A; Unknown B, Unknown C	8	NO	NO	NO	YES	YES	NO	NO	NO	NO	NO		Tetraethylsilicate; Methylacrylate, Ethylmethacrylate; Silicone	YES	NO													1	test walls		Natural weathering	7	NO	YES	NO	YES
NO	YES	NO	Bracci, S. and M. Joao Melo (2003). "Correlating Natural Ageing and Xenon Irradiation of Paraloid® B72 Applied on Stone. Polymer Degradation and Stability." Polymer Degradation and Stability - POLYM DEGRAD STABIL 80: 533-541.		2003		NO	NO	NO	YES	NO	NO	Sivec Marble	1	NO	NO	NO	NO	YES	NO	NO	NO	NO	NO		Acrylic resin	YES	NO	50	50	20	25	25	20	25	25	20				3				7	NO	YES	YES	NO
NO	YES	NO	Bracci, S., et al. (2004). Comparative study on durability of different treatments on sandstone after exposure in natural environment. I silicati nella conservazione: indagini, esperienze e valutazioni per il consolidamento dei manufatti storici. Torino, Associazione Villa dell'arte: 129-135.		2004		NO	NO	YES	NO	NO	NO	Pietra Forte	1	NO	NO	NO	YES	YES	NO	NO	NO	NO	NO		Siloxane; Metylsiloxane; Acrylic resin; Fluoroelastomer	YES	NO	50	50	15										1				5	NO	NO	YES	NO
NO	YES	NO	Gardei, A., et al. (2008). Performance and durability of a new anti-graffiti system for cultural heritage - The EC Project GRAFFITAGE. 11th International Congress on the Deterioration and Conservation of Stone. J. W. Łukaszewicz and P. Niemcewicz. Torun, Uniwersytetu Mikołaja Kopernika. and Garcia Mercero, O. (2008). Design and study of the behaviour of a new anti-graffiti concept specific for it…		2008		YES	NO	YES	NO	NO	YES	Balegem limestone; Belgian Blue limestone; Galdacano sandstone; Strtenica sandstone; Travertine; Villamayor sandstone	8	NO	NO	NO	NO	NO	NO	YES	NO	NO	NO		Acrylate; Methacrylates; Wax; Polyurethane	YES	YES	50	50	50										1				3	NO	YES	YES	NO
NO	YES	NO	von Plehwe, E., et al. (2004). Efficiency of anti-graffiti systems and their influence on stone surface. 10th International Congress on Deterioration and Conservation of Stone. D. Kwiatkowski and R. Löfvendahl, ICOMOS Sweden.		2004		NO	NO	YES	YES	NO	YES	Red Mainsandstone; Eifeltuff; Carrara marble	3	NO	NO	NO	NO	NO	NO	YES	NO	NO	NO		Polysaccharides; fluoropolymer; Acrylate, Silicone; Siloxane; acrylic resin; wax	YES	NO	300	300											1					NO	NO	YES	NO
NO	YES	NO	Pamplona, M. and M. Joao Melo (2008). Assessment of the long term behaviour of stone consolidants - a proposed methodology. International Symposium Stone Consolidation in Cultural Heritage. Research and Practice. J. Delgado Rodrigues and J. M. Mimoso. Lisbon, LNEC: 349-358.		2008		YES	NO	NO	NO	NO	NO	Anca stone; Lioz stone	2	NO	NO	NO	NO	YES	NO	NO	NO	NO	NO		Tetraethoxysilane; Acrylic resin; Epoxy resin	YES	NO													1	cubes of unknown size				NO	YES	YES	NO
NO	YES	NO	Luvidi, L., et al. (2012). Evaluation of TiO2 based treatments on stone surfaces exposed to a polluted urban environment. 12th International Congress on the Deterioration and Conservation of Stone, New York.		2012		YES	NO	NO	YES	NO	NO	Marble; Travertine; Lecce stone	3	NO	NO	NO	YES	NO	NO	NO	NO	NO	NO		Silane; Alkylsilane; Alkyilpolysiloxane; fluorinated acrylic polymer; TiO2 NPs	YES	YES	100	50	20										1					NO	NO	NO	NO
NO	YES	NO	Salvadori, B., et al. (2013). "Performance evaluation of two protective treatments on salt-laden limestones and marble after natural and artificial weathering." Environmental science and pollution research international 21.	10.1007/s11356-013-2032-z	2014		YES	NO	NO	YES	NO	NO	Lecce stone, Anca stone, Gioia Marble	3	NO	NO	NO	YES	NO	NO	NO	NO	NO	NO		polydimethylsiloxane; Ammonium Oxalate	YES	NO	50	50	30										1		polishing	salt contamination - NaCl	4	YES	YES	YES	NO
NO	YES	NO	Cappelletti, G., et al. (2015). "Smart hybrid coatings for natural stones conservation." Progress in Organic Coatings 78: 511-516.	10.1016/j.porgcoat.2014.05.029	2015		YES	YES	NO	YES	NO	NO	Botticino, Carrara Marble, Angera Stone	3	NO	NO	NO	YES	NO	NO	NO	NO	NO	NO		Polysiloxane; TiO2 NPs	YES	YES	10	10	10										1		polishing			NO	YES	YES	NO
NO	YES	NO	Natali, I., et al. (2015). "Innovative consolidating products for stone materials: field exposure tests as a valid approach for assessing durability." Heritage Science 3(1): 6.	10.1186/s40494-015-0036-3	2015		YES	YES	NO	YES	NO	NO	Carrara marble	1	NO	NO	NO	NO	YES	NO	NO	NO	NO	NO		Calcium Alkoxide, Nanolime	YES	YES	100	100	50										1			Thermal aging		NO	NO	YES	NO
NO	YES	NO	Natali, I., et al. (2015). "Innovative consolidating products for stone materials: field exposure tests as a valid approach for assessing durability." Heritage Science 3(1): 6.	10.1186/s40494-015-0036-3	2015		YES	YES	NO	YES	NO	NO	Carrara marble; Savonnières limestone	2	NO	NO	NO	NO	YES	NO	NO	NO	NO	NO		Calcium Alkoxide, Nanolime	YES	YES	100	100	50										1			Thermal aging (carrara); salt contamination Na2so4 (Savonnieres)		NO	NO	YES	NO
NO	YES	NO	Natali, I., et al. (2015). "Innovative consolidating products for stone materials: field exposure tests as a valid approach for assessing durability." Heritage Science 3(1): 6.	10.1186/s40494-015-0036-3	2015		YES	YES	NO	YES	NO	NO	Carrara marble; Laspra dolostone	2	NO	NO	NO	NO	YES	NO	NO	NO	NO	NO		Calcium Alkoxide, Nanolime	YES	YES	100	100	50										1			Thermal aging (carrara)		NO	NO	YES	NO
NO	YES	NO	Natali, I., et al. (2015). "Innovative consolidating products for stone materials: field exposure tests as a valid approach for assessing durability." Heritage Science 3(1): 6.	10.1186/s40494-015-0036-3	2015		YES	YES	NO	YES	NO	NO	Carrara marble; Albeşti limestone	2	NO	NO	NO	NO	YES	NO	NO	NO	NO	NO		Calcium Alkoxide, Nanolime	YES	YES	100	100	50										1			Thermal aging (carrara)		NO	NO	YES	NO
NO	YES	NO	Dreyfuss, T. and J. Cassar (2016). The Natural Weathering of an Artificially Induced Calcium Oxalate Patina on Soft Limestone. 13th International Congress on the Deterioration and Conservation of Stone. Paisley.		2016		YES	NO	NO	NO	NO	NO	Globigerina limestone	1	NO	NO	NO	NO	YES	NO	NO	NO	NO	NO		Ammonium Oxalate	NO	YES	50	50	50	50	50	10	50	50	10				3			Salt contamination		YES	NO	NO	NO
NO	YES	NO	Carmona-Quiroga, P. M., et al. (2016). Assessment of the cleaning efficiency of a selfcleaning coating on two stones under natural ageing. 13th International Congress on the Deterioration and Conservation of Stone. J. Hughes and T. Howind. Paisley, University of the West of Scotland. 2: 703-710.		2016		YES	NO	YES	NO	NO	NO	Portland limestone, Locharbriggs sandstone	2	NO	NO	NO	YES	NO	NO	NO	NO	NO	NO	self cleaning	TiO2 NPs	YES	NO	85	65	10										1					NO	NO	YES	NO
NO	YES	NO	Carmona-Quiroga, P. M., et al. (2017). "Durability of anti-graffiti coatings on stone: natural vs accelerated weathering." PLOS ONE 12(2): e0172347.	10.1371/journal.pone.0172347	2017		YES	NO	YES	NO	NO	NO	Portland limestone, Woodkirk sandstone	2	NO	NO	NO	NO	NO	NO	YES	NO	NO	NO		Polyurethane; wax	YES	NO	150	75	10	85	65	10	75	35	10	30	25	10	4					NO	YES	YES	NO
NO	YES	NO	Becherini, F., et al. (2017). "Effects of protective treatments on particle deposition and colour variation in stone surfaces exposed to an urban environment." Progress in Organic Coatings 112: 75-85.	10.1016/j.porgcoat.2017.06.029	2017		NO	NO	NO	YES	NO	NO	Carrara marble	1	NO	NO	NO	YES	NO	NO	NO	NO	NO	NO		Polydimethylsiloxane; Trimethoxysilane; Fluorinated polymer; TiO2 NPs	YES	NO	50	50	10										1				1	YES	NO	YES	NO
NO	YES	NO	Pelin, V., et al. (2018). "Assessment of Hydrophobic Coating on Porous Calcareous Rocks Surface Exposed in Urban Ambient Air Pollution." IOP Conference Series: Materials Science and Engineering 374: 012091.	10.1088/1757-899x/374/1/012091	2018		YES	NO	NO	NO	NO	NO	Oolithic calcareous limestone (Paun)	1	NO	NO	NO	YES	NO	NO	NO	NO	NO	NO			YES	NO														irregular fragmens with different sizes			1	NO	NO	YES	NO
NO	YES	NO	Elhaddad, F., et al. (2018). "Long-term effectiveness, under a coastal environment, of a novel conservation nanomaterial applied on sandstone from a Roman archaeological site." Journal of Cultural Heritage 34: 208-217.	10.1016/j.culher.2018.04.013	2018		NO	NO	YES	NO	NO	NO	Baelo Claudia stone	1	NO	NO	NO	YES	YES	NO	NO	NO	NO	NO		Alkoxysilane; Polydimethylsiloxane; Tetraethoxysilane; Silane; Siloxane	YES	YES	40	40	40										1		Desalination	Natural weathering	1	YES	NO	YES	NO
NO	YES	NO	Elhaddad, F., et al. (2018). "Long-term effectiveness, under a mountain environment, of a novel conservation nanomaterial applied on limestone from a Roman archaeological site." Materials 11(5): 694.	10.3390/ma11050694	2018		YES	NO	NO	NO	NO	NO	Acinipo limestone	1	NO	NO	NO	YES	YES	NO	NO	NO	NO	NO		Alkoxysilane; Polydimethylsiloxane; Tetraethoxysilane; Silane; Siloxane	YES	YES	40	40	40										1				1	YES	NO	YES	NO
NO	YES	NO	Carmona-Quiroga, P. M., et al. (2018). "Efficiency and durability of a self-cleaning coating on concrete and stones under both natural and artificial ageing trials." Applied Surface Science 433: 312-320.	10.1016/j.apsusc.2017.10.052	2018		YES	NO	YES	NO	NO	NO	Portland limestone, Woodkirk sandstone	2	NO	NO	NO	YES	NO	NO	NO	NO	NO	NO	self cleaning	TiO2 NPs	YES	NO	150	75	10	85	65	10	75	35	10				3				3	YES	YES	YES	NO
NO	YES	NO	Colangiuli, D., et al. (2019). "Field study in an urban environment of simultaneous self-cleaning and hydrophobic nanosized TiO2-based coatings on stone for the protection of building surface." Science of The Total Environment 650: 2919-2930.	10.1016/j.scitotenv.2018.10.044	2019		YES	NO	NO	NO	NO	NO	Trani stone	1	NO	NO	NO	YES	NO	NO	NO	NO	NO	NO		Fluoropolymer; TiO2 NPs	YES	YES	50	50	20										1				3	NO	NO	YES	NO
NO	YES	NO	Braun, F. and J. Orlowsky (2020). "Non-destructive detection of the efficiency of long-term weathered hydrophobic natural stones using single-sided NMR." Journal of Cultural Heritage 41: 51-60. and Braun, F., J. Orlowsky and S. Brüggerhoff (2020). "Analyzing Near-Surface Regions of Hydrophobic and Long-Term Weathered Natural Stones at Microscopic Scale." Heritage 3(2): 457-473. and Orlowsky, J., …	10.1016/j.culher.2019.07.005	2020	Zollern Institute	NO	NO	YES	NO	NO	NO	Baumberger sandstone; Schleeriether sandstone; Obernkirchner sandstone	3	NO	NO	NO	YES	NO	NO	NO	NO	NO	NO		Silane; Siloxane; Silicone; Tetraethoxysilane	YES	NO	200	200	300										1	triangle-prismatic geometry				YES	NO	YES	NO
NO	YES	NO	Sassoni, E., et al. (2021). "Phosphate treatments for stone conservation: 3-year field study in the Royal Palace of Versailles (France)." Materials and Structures 54(4): 140.	10.1617/s11527-021-01717-7	2021		NO	NO	NO	YES	NO	NO	White marble	1	NO	NO	NO	YES	YES	NO	NO	NO	NO	NO		Diammonium phosphate; Ammonium oxalate	NO	YES	100	100	30										1			Natural weathering	2	NO	NO	YES	NO
NO	YES	NO	Cao, Y., et al. (2021). "One-step fabrication of robust and durable superamphiphobic, self-cleaning surface for outdoor and in situ application on building substrates." Journal of Colloid and Interface Science 591: 239-252.	10.1016/j.jcis.2021.02.001	2021		YES	NO	YES	NO	NO	NO	Lecce stone, Pietra Serena	2	NO	NO	NO	YES	NO	NO	NO	NO	NO	NO		Fluorinated silane	NO	YES	50	50	20	50	50	10							2				3	YES	YES	YES	NO
NO	YES	NO	Lettieri, M., et al. (2021). "Eco-friendly protective coating to extend the life of art-works and structures made in porous stone materials." Coatings 11(11).	10.3390/coatings11111270	2021		YES	NO	NO	NO	NO	NO	Lecce stone	1	NO	NO	NO	YES	NO	NO	YES	NO	NO	NO		Fluorinated polymer	YES	NO	50	50	10										1		Polishing; washing; drying			YES	NO	YES	NO
NO	YES	NO	Pargoletti, E., et al. (2021). "Enhanced Historical Limestone Protection by New Organic/Inorganic Additive-Modified Resins." Coatings 11(1): 73.	10.3390/coatings11010073	2021		YES	NO	NO	NO	NO	NO	Vicenza stone	1	NO	NO	NO	YES	NO	NO	NO	NO	NO	NO		Polysiloxane; Acrylic resin; Silicone; Aminofunctional polysiloxane; Tetraethoxysilane	YES	YES	20	20	20										1		Polishing; washing		2	NO	YES	YES	NO
NO	YES	NO	Pargoletti, E., et al. (2022). "Calcitic-based stones protection by a low-fluorine modified methacrylic coating." Environmental Science and Pollution Research 29(20): 29455-29466.	10.1007/s11356-021-15515-9	2022		NO	NO	NO	YES	NO	NO	Candoglia marble	1	NO	NO	NO	YES	NO	NO	NO	NO	NO	NO		Fluorinated methacrylic polymer	NO	YES	50	50	10	20	20	20							2		Polishing; drying		10	YES	NO	YES	NO
NO	YES	NO	Tokarský, J., et al. (2022). "Long-term effect of weather in Dfb climate subtype on properties of hydrophobic coatings on sandstone." Journal of Building Engineering 52: 104383.	10.1016/j.jobe.2022.104383	2022		NO	NO	YES	NO	NO	NO	Msene sandstone	1	NO	NO	NO	YES	NO	NO	NO	NO	NO	NO	Antifouling	Polyalkylsiloxane; Zn NPs	YES	YES	100	40	30										1				5	NO	NO	YES	NO
NO	YES	NO	Elhaddad, F., et al. (2023). "Effectiveness and durability assessment, under extreme environmental conditions, of a superhydrophobic coating applied onto sandstone from Carteia roman archaeological site." Chemical Engineering Science 265: 118236.	10.1016/j.ces.2022.118236	2023		NO	NO	YES	NO	NO	NO	Unspecified sandstone	1	NO	NO	NO	YES	YES	NO	NO	NO	NO	NO		Ethylsilicate; Polydimethylsiloxane; SiO2 NPs; Tetraethoxysilane; silane, siloxane	YES	YES	40	40	40										1		Washing; drying	Natural weathering	3	YES	NO	YES	NO
NO	YES	NO	Eyssautier-Chuine, S., I. Franco-Castillo, A. Misra, J. Hubert, N. Vaillant-Gaveau, C. Streb and S. G. Mitchell (2023). "Evaluating the durability and performance of polyoxometalate-ionic liquid coatings on calcareous stones: Preventing biocolonisation in outdoor environments." Science of The Total Environment 884: 163739.	10.1016/j.scitotenv.2023.163739	2023		YES	NO	NO	NO	NO	NO	Savonnieres stone, Romery stone, Dom stone, Belgian Blue stone	4	NO	NO	NO	YES	NO	NO	NO	NO	NO	NO		POM-IL (Polyoxometalate Ionic Liquids)	NO	YES	50	50	10										1				3	YES	YES	YES	NO
NO	YES	NO	Ding, Y., S. Grassini, E. Angelini and N. Schiavon (2024). "Plasma enhanced chemical vapor deposition (PECVD) of SiOx thin films on Portuguese limestone: An experimental study." Journal of Cultural Heritage 70: 281-292.	10.1016/j.culher.2024.10.001	2024		YES	NO	NO	NO	NO	NO	Valinho do Rei limestone, Pidiogo limestone, Cabeco de Roxo limestone	3	NO	NO	NO	YES	NO	NO	NO	NO	NO	NO		Plasma-deposited SiOx thin films	NO	YES	50	50	10										1		polished, washed, dried, alcohol cleaned		2	NO	YES	NO	NO
NO	NO	YES	Adamson, C., et al. (2013). "The influence of aspect on the biological colonization of stone in Northern Ireland." International Biodeterioration & Biodegradation 84: 357-366.	10.1016/j.ibiod.2012.05.023	2013		YES	NO	YES	NO	NO	NO	Peakmoor Sandstone, Portland Limestone	2	NO	NO	NO	NO	NO	NO	NO	YES	NO	NO	aspect				200	400	20										1				2	NO	NO	YES	NO
YES	NO	YES	Cabello Briones, C. and H. Viles (2018). "An Assessment of the Role of an Open Shelter in Reducing Soiling and Microbial Growth on the Archaeological Site of the Bishop’s Palace, Witney, England." Conservation and Management of Archaeological Sites 20(1): 2-17.	10.1080/13505033.2018.1430437	2018		YES	NO	NO	NO	NO	NO	Portland Limestone	1	NO	NO	NO	NO	NO	NO	NO	YES	YES	NO	soiling				50	50	20										1				12	YES	NO	YES	NO
NO	NO	YES	Cámara, B., de Buergo, M.Á., Bethencourt, M., Fernández-Montblanc, T., La Russa, M.F., Ricca, M. and Fort, R., 2017. Biodeterioration of marble in an underwater environment. Science of the Total Environment, 609, pp.109-122.	10.1016/j.scitotenv.2017.07.103	2017		NO	NO	NO	YES	NO	NO	Carrara Marble, Macael marble	2	NO	NO	NO	NO	NO	NO	NO	NO	YES	NO					100	50	30										1		Polished		36	YES	NO	YES	NO
YES	NO	YES	Carter, N.E.A., Viles, H.A., 2003. Experimental investigations into the interactions between moisture, rock surface temperatures and an epilithic lichen cover in the bioprotection of limestone. Building and Environment 38, 1225-1234.	10.1016/S0360-1323(03)00079-9	2003		YES	NO	NO	NO	NO	NO	Saint Quentin limestone	1	YES	NO	NO	NO	NO	NO	NO	NO	YES	YES	Bio influence on stone temperature				45	45	40										1		Pre-colonised with lichen (Verrucaria nigrescens), encased in polystyrene		3	NO	NO	NO	NO
YES	NO	YES	Carter, N.E.A., Viles, H.A., 2004. Lichen hotspots: raised rock temperatures beneath Verrucaria nigrescens on limestone. Geomorphology 62, 1-16.	10.1016/j.geomorph.2004.02.001	2004		YES	NO	NO	NO	NO	NO	Saint Quentin limestone	1	YES	NO	NO	NO	NO	NO	NO	NO	YES	YES	Bio influence on stone temperature				45	45	40										1		Pre-colonised with lichen (Verrucaria nigrescens/V. baldensis), encased in polystyrene		3	NO	NO	NO	NO
YES	NO	YES	Coombes, M.A., Feal-Pérez, A., Naylor, L.A., Wilhelm, K., 2013. A non-destructive tool for detecting changes in the hardness of engineering materials: Application of the Equotip durometer in the coastal zone. Engineering Geology 167, 14-19.	10.1016/j.enggeo.2013.10.003	2013		YES	NO	NO	NO	YES	YES	Portland Limestone, Cornish (DeLank) granite, standard marine concrete	3	NO	NO	NO	NO	NO	NO	NO	NO	YES	NO					100	40	40										1		Sawn from larger samples from Coombes et al. (2011).		20	YES	NO	NO	NO
YES	NO	YES	Coombes, M.A., Naylor, L.A., Thompson, R.C., Roast, S.D., Gómez-Pujol, L., Fairhurst, R.J., 2011. Colonization and weathering of engineering materials by marine microorganisms: an SEM study. Earth Surface Processes and Landforms 36, 582-593.	10.1002/esp.2076	2011		YES	NO	NO	NO	YES	YES	Portland Limestone, Cornish (DeLank) granite, standard marine concrete	3	NO	NO	NO	NO	NO	NO	NO	YES	YES	NO					100	100	40										1				10	YES	NO	NO	NO
NO	NO	YES	Eyssautier-Chuine, S., Mouhoubi, K., Reffuveille, F., Bodnar, J.-L., 2020. Thermographic imaging for early detection of biocolonization on buildings. Building Research & Information 48, 856-865.	10.1080/09613218.2020.1730740	2020		YES	NO	NO	NO	NO	NO	Savonnieres stone	1	NO	NO	NO	NO	NO	NO	NO	YES	NO	NO	Biofilm-detection method (IRT)				20	20	10										1				3	YES	NO	YES	NO
YES	NO	YES	McIlroy de la Rosa, J.P., Warke, P.A., Smith, B.J., 2014. The effects of lichen cover upon the rate of solutional weathering of limestone. Geomorphology 220, 81-92.	10.1016/j.geomorph.2014.05.030	2014		YES	NO	NO	NO	NO	NO	Balliny limestone	1	NO	YES	NO	NO	NO	NO	NO	NO	YES	YES	Bio influence on solution weathering				/	/	/											210 cm2 surface area (irregular geometry samples)		Pre-colonised (lichen) and 'fresh' samples collected from natural outcrop	1	YES	NO	YES	NO
YES	NO	YES	Moroni, B., Pitzurra, L., Poli, G., 2004. Microbial growth and air pollutants in the corrosion of carbonate building stone: results of laboratory and outdoor experimental tests. Environmental Geology 46.	10.1007/s00254-004-1045-9	2004		YES	NO	NO	NO	NO	NO	Scaglia limestone	1	NO	NO	YES	NO	NO	NO	NO	YES	NO	NO	Influence of air pollution (dry deposition) on biocolonisation				20	15	3										1			Polished	11	NO	NO	NO	NO
NO	NO	YES	Naylor, L.A., Viles, H.A., 2002. A new technique for evaluating short-term rates of coastal bioerosion and bioprotection. Geomorphology 47, 31-44.	10.1016/S0169-555X(02)00139-3	2002		YES	NO	NO	NO	NO	NO	Bath stone	1	NO	NO	NO	NO	NO	NO	NO	YES	YES	YES					50	50	20										1				6	YES	NO	NO	NO
YES	NO	YES	Pitzurra, L., Moroni, B., Nocentini, A., Sbaraglia, G., Poli, G., Bistoni, F., 2003. Microbial growth and air pollution in carbonate rock weathering. International Biodeterioration & Biodegradation 52, 63-68.	10.1016/S0964-8305(02)00175-0	2003		YES	NO	NO	NO	NO	NO	Scaglia limestone	1	NO	NO	YES	NO	NO	NO	NO	YES	NO	NO					20	15	3										1			Polished	6	NO	NO	NO	NO
NO	NO	YES	Sanmartin, P., Grove, R., Carballeira, R., Viles, H., 2020. Impact of colour on the bioreceptivity of granite to the green alga Apatococcus lobatus: Laboratory and field testing. Sci Total Environ 745, 141179.	10.1016/j.scitotenv.2020.141179	2020		NO	NO	NO	NO	YES	NO	Grissal, Rosa Porrino	2	NO	NO	NO	NO	NO	NO	NO	YES	NO	NO					60	60	15										1				4	YES	NO	YES	NO
YES	NO	YES	Thornbush, M., Viles, H., 2006. Changing patterns of soiling and microbial growth on building stone in Oxford, England after implementation of a major traffic scheme. Sci Total Environ 367, 203-211.	10.1016/j.scitotenv.2005.11.022	2006		YES	NO	NO	NO	NO	NO	Bath stone	1	NO	NO	YES	NO	NO	NO	NO	YES	NO	NO	Co-influence of air quality on colonisation				33	33	/										1	Stated as '3.3 cm diameter' disks			20		NO	NO	NO
NO	YES	YES	Urquhart, D.C.M., Young, M.E., Wakefield, R.D., Tonge, K., Nicholson, K., 1996. A field investigation of algal growths and biocide efficacy on sandstone buildings and monuments. Journal of architectural conservation, v.2, no.1 2, pp.55-73	10.1080/13556207.1996.10785153	1996		NO	NO	YES	NO	NO	NO	Blaxter, Cat Castle, Clashach, Corsehill, Leoch, Locharbriggs	6	NO	NO	NO	NO	NO	YES	NO	YES	NO	NO	Biocide testing				50	50	15										1			Freshly cut, roughened, chemically cleaned, biocide treated.	3			YES	NO
YES	NO	YES	Viles, H.A., Gorbushina, A.A., 2003. Soiling and microbial colonisation on urban roadside limestone: a three year study in Oxford, England. Building and Environment 38, 1217-1224.	10.1016/S0360-1323(03)00078-7	2003		YES	NO	NO	NO	NO	NO	Stoke Ground	1	NO	NO	YES	NO	NO	NO	NO	YES	NO	NO	Soiling rates				33	33	/										1	Stated as '3.3 cm diameter' disks			15			NO	NO
NO	NO	YES	Warscheid, T., Becker, T., Braams, J., Gehrmann, C., Krumbein, W., Petersen, K., Bruggerhoff, S., 1993. Studies on the temporal development of microbial infection of different types of sedimentary rocks and its effect on the alteration of the physico-chemical properties in building materials, in: Thiel, M.-J. (Ed.), Conservation of stone and other materials: proceedings of the international RILEM…		1993		YES	NO	YES	NO	NO	NO	Dietenhaner Mainsandstein, Sander Schilfsandstein, Schonbucher Sandstein, Auer Kalk, Obernkirchner Sandstein, Ihlersteiner Grunsandstein, Anrochter Dolomit,	7	NO	NO	NO	NO	NO	NO	NO	YES	YES	NO					/	/	/										1	Irregular geometry - stone 'Asterix' blocks		Inoculated with microbes	/	NO	NO	YES	NO
NO	NO	YES	Sterflinger, K., Rohatsch, A., Belanyecz, L., Huber, A., 2020. Live and let die? Biofilms on stone: Possibilities, limits and risks of combating.		2020		NO	NO	YES	YES	NO	YES	Lindabrunn conglomerate, Aflenz sandstone, St. Margarethen sandstone, Laas marble, Carrara marble	5	NO	NO	NO	NO	NO	NO	NO	YES	NO	NO					/	/	/										1	Irregular geometry - 'Steinmannlein' blocks; free-standing monoliths			4	NO	NO	NO	NO
YES	NO	YES	Zanardini, E., Abbruscato, P., Ghedini, N., Realini, M., Sorlini, C., 2000. Influence of atmospheric pollutants on the biodeterioration of stone. International Biodeterioration & Biodegradation 45, 35-42.	10.1016/S0964-8305(00)00043-3	2000		NO	NO	NO	YES	NO	NO	Saltrio, Carrara, Candoglia marble		NO	NO	YES	NO	NO	NO	NO	NO	YES	NO	Atmospheric pollution				50	50	20										1				60		NO	YES	NO
NO	YES	YES	Pinna, D., Galeotti, M., Perito, B., Daly, G., Salvadori, B., 2018. In situ long-term monitoring of recolonization by fungi and lichens after innovative and traditional conservative treatments of archaeological stones in Fiesole (Italy). International Biodeterioration & Biodegradation 132, 49-58.	10.1016/j.ibiod.2018.05.003	2018		NO	NO	YES	YES	NO	YES	Marble (unnamed), Pietra Serena sandstone, Plaster (Roman)	3	NO	NO	NO	NO	YES	NO	NO	YES	NO	NO	Consolidant effects on biocolonisation				150	100	/										1	Exposed surfaces of in-situ slabs (geometry estimated from photos)		Surfaces treated with consolidant + biocide: (1) Bioestel, (2) Silo 111 + nanoCu, (3) Acrilico 30 + nanoCu, and (4) Estel 1000 + nanoCu	1	NO	NO	NO	NO
NO	NO	YES	Eyssautier-Chuine, S., Vaillant-Gaveau, N., Charpentier, E., Reffuveille, F., 2021. Comparison of biofilm development on three building and restoration stones used in French monuments. International Biodeterioration & Biodegradation 165, 105322.	10.1016/j.ibiod.2021.105322	2021		YES	NO	NO	NO	NO	NO	Courville limestone, Ditrupa limestone, Savonnieres limestone	1	NO	NO	NO	NO	NO	NO	NO	YES	NO	NO					20	20	10	100	100	50							2	NB. smaller samples were harvested monthly for culturing (n = 3); larger samples (n = 4) left for full duration		All samples sterilized prior to exposure	3,4		NO	YES	NO
NO	NO	YES	Chen, J., Zhao, Q., Li, F., Zhao, X., Wang, Y., Zhang, L., Liu, J., Yan, L., Yu, L., 2023. Nutrient availability and acid erosion determine the early colonization of limestone by lithobiontic microorganisms. Frontiers in Microbiology 14.	10.3389/fmicb.2023.1194871	2023		YES	NO	NO	NO	NO	NO	Unnamed limestone from southwest China	1	NO	YES	NO	NO	NO	NO	NO	YES	NO	NO	Nutrient availability on lithobiontic colonisation				/	/	/										1	Pulverized/granular samples		Different acid+nutrient soloutions applied prior to exposure	3		NO	NO	NO
YES	NO	NO	Kessler, D. and R. Anderson (1951). Stone Exposure Test Wall, Building Materials and Structures Report 125 and Stutzman, P. E. and J. R. Clifton (1997). Stone Exposure Test Wall at NIST. Degradation of natural building stone : proceedings of two sessions sponsored by the Rock Mechanics Committee of the Geo-Institute of the American Society of Civil Engineers in conjunction with the ASCE Convention		1997	NIST wall	YES	YES	YES	YES	YES	YES		30	YES	NO	NO	NO	NO	NO	NO	NO	NO	NO					102	102	1021	300	300	300							4	at least 2 additional geometries for the angular blocks				YES		NO	YES
YES	NO	NO	Kessler, D. and R. Anderson (1951). Stone Exposure Test Wall, Building Materials and Structures Report 125 and Stutzman, P. E. and J. R. Clifton (1997). Stone Exposure Test Wall at NIST. Degradation of natural building stone : proceedings of two sessions sponsored by the Rock Mechanics Committee of the Geo-Institute of the American Society of Civil Engineers in conjunction with the ASCE Convention		1997	NIST wall	YES	YES	YES	YES	YES	YES		30	YES	NO	NO	NO	NO	NO	NO	NO	NO	NO					102	102	1021	300	300	300							4	at least 2 additional geometries for the angular blocks				YES		NO	YES
YES	YES	YES	Wilhelm, K., et al. (2022). Complexities in comparing UPV data over a >30-year exposure trial of consolidated sandstone. International Symposium Stone Consolidation in Cultural Heritage.		2020	Stone Deterioration and Stone Conservation Project - Asterixe	YES	YES	YES	YES	NO	YES	Eichenbuehler sandstone, Ihrlersteiner sandstone, Schoenbucher sandstone, Anroechter dolomit, Obernkirchner sandstone, Sander sandstone, Auerkalk, Krensheimer Kalk, Ruhrsandstein, Bucher Sandstein, Elm Kalk, Sollingen BuntSandstein	12	YES	YES	NO	YES	YES	NO	NO	NO	NO	NO		silan-modified polyurethane, epoxy resin	NO	YES	200	300	800										1				11			NO	NO
YES	YES	YES	Wilhelm, K., et al. (2022). Complexities in comparing UPV data over a >30-year exposure trial of consolidated sandstone. International Symposium Stone Consolidation in Cultural Heritage.		2020	Stone Deterioration and Stone Conservation Project - Asterixe	YES	YES	YES	YES	NO	YES	Eichenbuehler sandstone, Ihrlersteiner sandstone, Schoenbucher sandstone, Anroechter dolomit, Obernkirchner sandstone, Sander sandstone, Auerkalk, Krensheimer Kalk, Ruhrsandstein, Bucher Sandstein, Elm Kalk, Sollingen BuntSandstein	12	YES	YES	NO	YES	YES	NO	NO	NO	NO	NO		silan-modified polyurethane, epoxy resin	NO	YES	200	300	800										1				11			NO	NO
YES	NO	NO	Luckat, S. (1981). "Quantitative untersuchung des einflusses von luftverunreinigungen bei der zerstoerung von naturstein." Staub. Reinhaltung der Luft 41(11): 440-442.		1981		YES	NO	YES	NO	NO	NO	Baumberger sandstone, Krensheim Muschelkalk	2	NO	YES	YES	NO	NO	NO	NO	NO	NO	NO					60	60	3										1							YES	NO
YES	NO	NO	NATO (1985). Atmospheric measurements of air pollution : a report of the NATO/CCMS pilot study on conservation and restoration of monuments / submitted by the pilot country for this sub-project, Federal Republic of Germany, November 1985. Brussels], [Brussels] : NATO, Committee on the Challenges of Modern Society, 1985.		1985		YES	NO	YES	NO	NO	NO	Baumberger sandstone, Krensheim Muschelkalk	2	NO	YES	YES	NO	NO	NO	NO	NO	NO	NO					60	60	3										1		Edges bevelled			NO	NO	YES	NO
YES	NO	NO	NATO (1985). Atmospheric measurements of air pollution : a report of the NATO/CCMS pilot study on conservation and restoration of monuments / submitted by the pilot country for this sub-project, Federal Republic of Germany, November 1985. Brussels], [Brussels] : NATO, Committee on the Challenges of Modern Society, 1985.		1985		YES	NO	YES	NO	NO	NO	Baumberger sandstone, Krensheim Muschelkalk	2	NO	YES	YES	NO	NO	NO	NO	NO	NO	NO					60	60	3										1		Edges bevelled			NO	NO	YES	NO
YES	NO	NO	NATO (1985). Atmospheric measurements of air pollution : a report of the NATO/CCMS pilot study on conservation and restoration of monuments / submitted by the pilot country for this sub-project, Federal Republic of Germany, November 1985. Brussels], [Brussels] : NATO, Committee on the Challenges of Modern Society, 1985.		1985		YES	NO	YES	NO	NO	NO	Baumberger sandstone, Krensheim Muschelkalk	2	NO	YES	YES	NO	NO	NO	NO	NO	NO	NO					60	60	3										1		Edges bevelled			NO	NO	YES	NO
YES	NO	NO	NATO (1985). Atmospheric measurements of air pollution : a report of the NATO/CCMS pilot study on conservation and restoration of monuments / submitted by the pilot country for this sub-project, Federal Republic of Germany, November 1985. Brussels], [Brussels] : NATO, Committee on the Challenges of Modern Society, 1985.		1985		YES	NO	YES	NO	NO	NO	Baumberger sandstone, Krensheim Muschelkalk	2	NO	YES	YES	NO	NO	NO	NO	NO	NO	NO					60	60	3										1		Edges bevelled			NO	NO	YES	NO
YES	NO	NO	NATO (1985). Atmospheric measurements of air pollution : a report of the NATO/CCMS pilot study on conservation and restoration of monuments / submitted by the pilot country for this sub-project, Federal Republic of Germany, November 1985. Brussels], [Brussels] : NATO, Committee on the Challenges of Modern Society, 1985.		1985		YES	NO	YES	NO	NO	NO	Baumberger sandstone, Krensheim Muschelkalk	2	NO	YES	YES	NO	NO	NO	NO	NO	NO	NO					60	60	3										1		Edges bevelled			NO	NO	YES	NO
YES	NO	NO	NATO (1985). Atmospheric measurements of air pollution : a report of the NATO/CCMS pilot study on conservation and restoration of monuments / submitted by the pilot country for this sub-project, Federal Republic of Germany, November 1985. Brussels], [Brussels] : NATO, Committee on the Challenges of Modern Society, 1985.		1985		YES	NO	YES	NO	NO	NO	Baumberger sandstone, Krensheim Muschelkalk	2	NO	YES	YES	NO	NO	NO	NO	NO	NO	NO					60	60	3										1		Edges bevelled			NO	NO	YES	NO
YES	NO	NO	NATO (1985). Atmospheric measurements of air pollution : a report of the NATO/CCMS pilot study on conservation and restoration of monuments / submitted by the pilot country for this sub-project, Federal Republic of Germany, November 1985. Brussels], [Brussels] : NATO, Committee on the Challenges of Modern Society, 1985.		1985		YES	NO	YES	NO	NO	NO	Baumberger sandstone, Krensheim Muschelkalk	2	NO	YES	YES	NO	NO	NO	NO	NO	NO	NO					60	60	3										1		Edges bevelled			NO	NO	YES	NO
YES	NO	NO	NATO (1985). Atmospheric measurements of air pollution : a report of the NATO/CCMS pilot study on conservation and restoration of monuments / submitted by the pilot country for this sub-project, Federal Republic of Germany, November 1985. Brussels], [Brussels] : NATO, Committee on the Challenges of Modern Society, 1985.		1985		YES	NO	YES	NO	NO	NO	Baumberger sandstone, Krensheim Muschelkalk	2	NO	YES	YES	NO	NO	NO	NO	NO	NO	NO					60	60	3										1		Edges bevelled			NO	NO	YES	NO
YES	NO	NO	NATO (1985). Atmospheric measurements of air pollution : a report of the NATO/CCMS pilot study on conservation and restoration of monuments / submitted by the pilot country for this sub-project, Federal Republic of Germany, November 1985. Brussels], [Brussels] : NATO, Committee on the Challenges of Modern Society, 1985.		1985		YES	NO	YES	NO	NO	NO	Baumberger sandstone, Krensheim Muschelkalk	2	NO	YES	YES	NO	NO	NO	NO	NO	NO	NO					60	60	3										1		Edges bevelled			NO	NO	YES	NO
YES	NO	NO	Youngdahl, C. A. and B. R. Doe (1986). Effects of Atmospheric Exposure on Roughnening, Recession, and Chemical Alteration of Marble and Limestone Sample Surfaces in the Eastern United States. Materials Degradation Caused by Acid Rain. R. Baboian, American Chemical Society: 266-284.		1986	NAPAP	YES	NO	NO	YES	NO	NO	Indiana limestone, Vermont marble	2	YES	YES	NO	NO	NO	NO	NO	NO	NO	NO					83	75	51										1		polishing, washing, drying		3			YES	NO
YES	NO	NO	Reddy, M. M., et al. (1986). Limestone and Marble Dissolution by Acid Rain: an Onsite Weathering Experiment. Materials Degradation Caused by Acid Rain. R. Baboian, American Chemical Society: 227-238. and Reddy, M. M. (1987). "Acid-rain damage to carbonate stone; a preliminary quantitative assessment based on the aqueous geochemistry of rainfall runoff." Water-Resources Investigations Report.		1987	NAPAP	YES	NO	NO	YES	NO	NO	Indiana limestone, Vermont marble	2	NO	YES	NO	NO	NO	NO	NO	NO	NO	NO					610	305	50										1				2			NO	NO
YES	NO	NO	Jaynes and Cooke 1987. Stone weathering in Southeast England	10.1016/0004-6981(87)90321-0	1987		YES	NO	NO	NO	NO	NO	Portland Limestone, Monk's Park Limestone	2	NO	YES	YES	NO	NO	NO	NO	NO	NO	NO					50	50	10										1		washing, brushing, drying after cutting. Edges bevelled		6	NO	NO	YES	NO
YES	NO	NO	Viles 1989. Short communication: The early stages of building stone decay in urban environments		1989		YES	NO	NO	NO	NO	NO	Portland Limestone, Monk's Park Limestone	2	NO	NO	YES	NO	NO	NO	NO	NO	NO	NO					10	10	5										1				8	YES	NO	YES	NO
YES	NO	NO	Webb, A. H., R. J. Bawden, A. K. Busby and J. N. Hopkins (1992). "Studies on the effects of air pollution on limestone degradation in Great Britain." Atmospheric Environment		1992	CEGB/CAC	YES	NO	NO	NO	NO	NO	Portland Limestone	1	NO	YES	NO	NO	NO	NO	NO	NO	NO	NO					40	40	40										1		washing, drying		3	NO	NO	YES	NO
YES	NO	NO	Flinn, D. R., et al. (1985). "Field exposure study for determining the effects of acid deposition on the corrosion and deterioration of materials - description of program and preliminary results." Durability of Building Materials AND Baedecker, P. A., et al. (1992). "Effects of acidic deposition on the erosion of carbonate stone — experimental results from the U.S. National Acid Precipitation Ass…		1985	NAPAP	YES	NO	NO	YES	NO	NO	Vermont marble, Indiana limestone (AKA Salem limestone)	2	NO	YES	YES	NO	NO	NO	NO	NO	NO	NO					300	600	51	50	76	89							2		polishing (marble), washing, drying, edges rounded	additional set from naturally weathered substrates	3	NO	NO	YES	NO
YES	NO	NO	Butlin, R. N., et al. (1992). "Preliminary results from the analysis of stone tablets from the National Materials Exposure Programme (NMEP)." Atmospheric Environment. Part B. Urban Atmosphere and Butlin, Yates, Murray, Ashall 1995 and Viles, H. A., et al. (2002). "Soiling and decay of N.M.E.P. limestone tablets." Science of The Total Environment 292(3): 215-229.		1992	NMEP	YES	YES	NO	NO	NO	NO	Portland Limestone, Monk's Park Limestone, White Mansfiled sandstone	3	YES	YES	YES	NO	NO	NO	NO	NO	NO	NO					50	50	8										1		washing, drying		3	YES	NO	YES	NO
YES	NO	NO	Whalley, B., et al. (1992). Short-term exposure of limestone test specimens in Venice. 7th International Congress on Deterioration and Conservation of Stone.		1992		YES	NO	NO	NO	NO	NO	Portland limestone, Northern Ireland Chalk	2	NO	NO	YES	NO	NO	NO	NO	NO	NO	NO	Surface alteration																1	20 mm dia disks			1	YES	NO	YES	NO
YES	NO	NO	Wittenburg, C. and W. Dannecker (1992). "Dry deposition and deposition velocity of airborne acidic species upon different sandstones." Journal of Aerosol Science 23: 869-872.	10.1016/0021-8502(92)90549-B	1992		NO	NO	YES	NO	NO	NO	Obernkirchen sandstone, Sander sandstone, Ihrlerstein sandstone	3	NO	NO	YES	NO	NO	NO	NO	NO	NO	NO					50	50	5										1							YES	NO
YES	NO	NO	Turkington, A. V., et al. (1997). Short-term stone surface modification: an example from Venice. Proceedings: 4th International Symposium on the Conservation of Monuments in the Mediterranean		1997		YES	NO	YES	NO	NO	NO	Portland limestone, Baumberger sandstone, Dunhouse sandstone	3	NO	NO	YES	NO	NO	NO	NO	NO	NO	NO	Surface alteration				70	50	10										1				1	YES	NO	YES	NO
YES	NO	NO	Realini, M., et al. (1995). "Deposition of particulate matter on stone surfaces: an experimental verification of its effects on Carrara marble." Science of The Total Environment " and Realini, M., et al. (1997). The decay of Saltrio stone exposed in a polluted area. A quantitative approach. Proceedings: 4th International Symposium on the Conservation of Monuments in the Mediterranean		1995		NO	YES	NO	YES	NO	NO	Saltrio stone, Carrara Marble	2	NO	NO	YES	NO	NO	NO	NO	NO	NO	NO					48	48	20										1		washing, drying		5	YES	NO	YES	NO
YES	NO	NO	Delalieux, F., et al. (1997). Weathering mechanism of Pentelic marble under ambient atmospheric conditions derived from runoff studies. Proceedings: 4th International Symposium on the Conservation of Monuments in the Mediterranean		1997		NO	NO	NO	YES	NO	NO	Pentelic marble	1	NO	YES	NO	NO	NO	NO	NO	NO	NO	NO					250	250	50										1				3	NO	NO	NO	NO
YES	NO	NO	Snethlage, R. and S. Simon (1992). Eureka Project EU 496 Eurocare-Euromarble. 7th International Congress on Deterioration and Conservation of Stone. and Simon, S. and R. Snethlage (1993). The first stages of marble weathering, preliminary results after short-term exposure of nine months. Conservation of stone and other materials: proceedings of the international RILEM/UNESCO congress		1993	EUROCARE - EUROMARBLE	NO	NO	NO	YES	NO	NO	Carrara marble, Laas marble, Pentelic marble, Ekeberg marble	4	NO	NO	YES	NO	NO	NO	NO	NO	NO	NO	color change				100	100	150										1	Irregular prism with sloping faces and cut out	polishing			YES	NO	YES	NO
YES	NO	NO	Snethlage, R. and S. Simon (1992). Eureka Project EU 496 Eurocare-Euromarble. 7th International Congress on Deterioration and Conservation of Stone. and Simon, S. and R. Snethlage (1993). The first stages of marble weathering, preliminary results after short-term exposure of nine months. Conservation of stone and other materials: proceedings of the international RILEM/UNESCO congress		1993	EUROCARE - EUROMARBLE	NO	NO	NO	YES	NO	NO	Carrara marble, Laas marble, Pentelic marble, Ekeberg marble	4	NO	NO	YES	NO	NO	NO	NO	NO	NO	NO	color change				100	100	150										1	Irregular prism with sloping faces and cut out	polishing			YES	NO	YES	NO
YES	NO	NO	Snethlage, R. and S. Simon (1992). Eureka Project EU 496 Eurocare-Euromarble. 7th International Congress on Deterioration and Conservation of Stone. and Simon, S. and R. Snethlage (1993). The first stages of marble weathering, preliminary results after short-term exposure of nine months. Conservation of stone and other materials: proceedings of the international RILEM/UNESCO congress		1993	EUROCARE - EUROMARBLE	NO	NO	NO	YES	NO	NO	Carrara marble, Laas marble, Pentelic marble, Ekeberg marble	4	NO	NO	YES	NO	NO	NO	NO	NO	NO	NO	color change				100	100	150										1	Irregular prism with sloping faces and cut out	polishing			YES	NO	YES	NO
YES	NO	NO	Snethlage, R. and S. Simon (1992). Eureka Project EU 496 Eurocare-Euromarble. 7th International Congress on Deterioration and Conservation of Stone. and Simon, S. and R. Snethlage (1993). The first stages of marble weathering, preliminary results after short-term exposure of nine months. Conservation of stone and other materials: proceedings of the international RILEM/UNESCO congress		1993	EUROCARE - EUROMARBLE	NO	NO	NO	YES	NO	NO	Carrara marble, Laas marble, Pentelic marble, Ekeberg marble	4	NO	NO	YES	NO	NO	NO	NO	NO	NO	NO	color change				100	100	150										1	Irregular prism with sloping faces and cut out	polishing			YES	NO	YES	NO
YES	NO	NO	Snethlage, R. and S. Simon (1992). Eureka Project EU 496 Eurocare-Euromarble. 7th International Congress on Deterioration and Conservation of Stone. and Simon, S. and R. Snethlage (1993). The first stages of marble weathering, preliminary results after short-term exposure of nine months. Conservation of stone and other materials: proceedings of the international RILEM/UNESCO congress		1993	EUROCARE - EUROMARBLE	NO	NO	NO	YES	NO	NO	Carrara marble, Laas marble, Pentelic marble, Ekeberg marble	4	NO	NO	YES	NO	NO	NO	NO	NO	NO	NO	color change				100	100	150										1	Irregular prism with sloping faces and cut out	polishing			YES	NO	YES	NO
YES	YES	NO	Snethlage, R. and S. Simon (1992). Eureka Project EU 496 Eurocare-Euromarble. 7th International Congress on Deterioration and Conservation of Stone. and Simon, S. and R. Snethlage (1993). The first stages of marble weathering, preliminary results after short-term exposure of nine months. Conservation of stone and other materials: proceedings of the international RILEM/UNESCO congress		1993	EUROCARE - EUROMARBLE	NO	NO	NO	YES	NO	NO	Carrara marble, Laas marble, Pentelic marble, Ekeberg marble	4	NO	NO	YES	NO	NO	NO	NO	NO	NO	NO	color change				100	100	150										1	Irregular prism with sloping faces and cut out	polishing			YES	NO	YES	NO
YES	NO	NO	Steiger, M., et al. (1993). Deposition and enrichment of atmospheric pollutants on building stones as determined by field exposure experiments. Conservation of stone and other materials: proceedings of the international RILEM/UNESCO congress		1993	Stone Deterioration and Stone Conservation Project - Asterixe	YES	NO	YES	NO	NO	NO	Ihrlersteiner sandstone, Obernkirchen, Anrochte sandstone, Auer limestone	7	NO	NO	YES	NO	NO	NO	NO	NO	NO	NO					200	300	450										1					NO	NO	NO	NO
YES	NO	NO	Halsey, D. P., et al. (1995). "Real time measurements of sandstone deterioration: a microcatchment study." Building and Environment 30	10.1016/0360-1323(94)00060-6	1995		NO	NO	YES	NO	NO	NO	Mottled Hollington sandstone	1	NO	YES	NO	NO	NO	NO	NO	NO	NO	NO					220	220	50										1				3	NO		NO	NO
YES	NO	NO	Henriksen, J. F. (1995). "Reactions of gases on calcareous stones under dry conditions in field and laboratory studies." Water, Air, and Soil Pollution, 85 (4)	10.1007/BF01186243	1995	EEC-STEP	YES	NO	YES	YES	NO	NO	Pentelic marble, Carrara marble, Pietra Serena, Vicenza limestone	4	NO	NO	YES	NO	NO	NO	NO	NO	NO	NO					50	50	10										1					NO	YES	YES	NO
YES	NO	NO	Inkpen, R. (1995). "Errors in measuring the percentage dry weight change of stone tablets." Earth Surface Processes and Landforms 20(9): 783-793.	10.1002/esp.3290200904	1995		YES	NO	NO	NO	NO	NO	Portland Limestone, Monk's Park Limestone	2	NO	YES	NO	NO	NO	NO	NO	NO	NO	NO					50	50	10										1		washing, brushing, drying after cutting		6	NO	NO	YES	NO
YES	NO	NO	O'Brien, P. F., et al. (1995). "Stone loss rates at sites around Europe." Science of The Total Environment 167(1): 111-121.	10.1016/0048-9697(95)04574-K	1995		YES	NO	YES	YES	NO	NO	Massangis limestone, Mansfield sandstone, Pentelic marble	3	NO	YES	NO	NO	NO	NO	NO	NO	NO	NO																	1	23.5 cm diameter hemispheres				NO	NO	NO	NO
YES	NO	NO	O'Brien, P. F., et al. (1995). "Stone loss rates at sites around Europe." Science of The Total Environment 167(1): 111-121.	10.1016/0048-9697(95)04574-K	1995		YES	NO	YES	YES	NO	NO	Massangis limestone, Mansfield sandstone, Pentelic marble	3	NO	YES	NO	NO	NO	NO	NO	NO	NO	NO																	1	23.5 cm diameter hemispheres				NO	NO	NO	NO
YES	NO	NO	O'Brien, P. F., et al. (1995). "Stone loss rates at sites around Europe." Science of The Total Environment 167(1): 111-121.	10.1016/0048-9697(95)04574-K	1995		YES	NO	YES	YES	NO	NO	Massangis limestone, Mansfield sandstone, Pentelic marble	3	NO	YES	NO	NO	NO	NO	NO	NO	NO	NO																	1	23.5 cm diameter hemispheres				NO	NO	NO	NO
YES	NO	NO	O'Brien, P. F., et al. (1995). "Stone loss rates at sites around Europe." Science of The Total Environment 167(1): 111-121.	10.1016/0048-9697(95)04574-K	1995		YES	NO	YES	YES	NO	NO	Massangis limestone, Mansfield sandstone, Pentelic marble	3	NO	YES	NO	NO	NO	NO	NO	NO	NO	NO																	1	23.5 cm diameter hemispheres				NO	NO	NO	NO
YES	NO	NO	O'Brien, P. F., et al. (1995). "Stone loss rates at sites around Europe." Science of The Total Environment 167(1): 111-121.	10.1016/0048-9697(95)04574-K	1995		YES	NO	YES	YES	NO	NO	Massangis limestone, Mansfield sandstone, Pentelic marble	3	NO	YES	NO	NO	NO	NO	NO	NO	NO	NO																	1	23.5 cm diameter hemispheres				NO	NO	NO	NO
YES	NO	NO	O'Brien, P. F., et al. (1995). "Stone loss rates at sites around Europe." Science of The Total Environment 167(1): 111-121.	10.1016/0048-9697(95)04574-K	1995		YES	NO	YES	YES	NO	NO	Massangis limestone, Mansfield sandstone, Pentelic marble	3	NO	YES	NO	NO	NO	NO	NO	NO	NO	NO																	1	23.5 cm diameter hemispheres				NO	NO	NO	NO
YES	NO	NO	O'Brien, P. F., et al. (1995). "Stone loss rates at sites around Europe." Science of The Total Environment 167(1): 111-121.	10.1016/0048-9697(95)04574-K	1995		YES	NO	YES	YES	NO	NO	Massangis limestone, Mansfield sandstone, Pentelic marble	3	NO	YES	NO	NO	NO	NO	NO	NO	NO	NO																	1	23.5 cm diameter hemispheres				NO	NO	NO	NO
YES	NO	NO	Cooper, T. P., et al. (1992). "Rates of Deterioration of Portland Limestone in an Urban Environment." Studies in Conservation 37(4): 228-238.	10.2307/1506352	1992		YES	NO	NO	NO	NO	NO	Portland limestone	1	NO	YES	NO	NO	NO	NO	NO	NO	NO	NO					250	250											1				2	NO	NO	NO	NO
YES	NO	NO	Grossi, C., et al. (1995). "Response of Porous Building Stones to Acid Deposition." Water, Air, & Soil Pollution 85: 2713-2718. and Grossi, C. M., et al. (1998). "Decay and durability of building stones in urban environments." Materiales de Construcción 48(252): 5-25.	10.1007/BF01186244	1995		YES	YES	NO	NO	NO	NO	Laspra dolostone, Hontoria Limestone, Portland limestone	3	NO	YES	YES	NO	NO	NO	NO	NO	NO	NO					50	50	10										1					NO	YES	YES	NO
YES	NO	NO	Grossi, C., et al. (1995). "Response of Porous Building Stones to Acid Deposition." Water, Air, & Soil Pollution 85: 2713-2718. and Grossi, C. M., et al. (1998). "Decay and durability of building stones in urban environments." Materiales de Construcción 48(252): 5-25.	10.3989/mc.1998.v48.i252.461	1998		YES	YES	NO	NO	YES	NO	Laspra dolostone, Hontoria Limestone, Portland limestone, Combe Down limestone, Rosa Porrino granite	5	YES	NO	YES	NO	NO	NO	NO	NO	NO	NO					50	50	10	10	10	10							2							YES	NO
YES	NO	NO	Brueggerhoff, S., et al. (1996). Environmental monitoring with natural stone sensors. 8th International Congress on Deterioration and Conservation of Stone		1996	Zollern Institute	NO	NO	YES	NO	NO	NO	Baumberg sandstone	1	NO	YES	YES	NO	NO	NO	NO	NO	NO	NO					50	40	5										1				2	YES	NO	YES	NO
YES	NO	NO	Yerrapragada, S. S., et al. (1996). "Weathering Rates of Marble in Laboratory and Outdoor Conditions." Journal of Environmental Engineering 122(9): 856-863.	10.1061/(asce)0733-9372(1996)122:9(856)	1996		NO	NO	NO	YES	NO	NO	Carrara marble	1	NO	YES	YES	NO	NO	NO	NO	NO	NO	NO					125	101	16	52	54	16							2				3	NO	YES	YES	NO
YES	NO	NO	Zappia, G., et al. (1998). "Exposure tests of building materials in urban atmosphere." Science of The Total Environment 224(1-3): 235-244.		1998		YES	NO	NO	YES	NO	YES	Carrara marble, Travertine, Trani limestone, Portland limestone	4	YES	YES	YES	NO	NO	NO	NO	NO	NO	NO					10	10	5										1		washing in sonication bath, drying		1	NO	NO	YES	NO
YES	NO	NO	Pio, C. A., et al. (1998). "Atmospheric aerosol and soiling of external surfaces in an urban environment." Atmospheric Environment 32(11): 1979-1989.	10.1016/S1352-2310(97)00507-4	1998		YES	NO	YES	NO	NO	NO	Portland limestone, Mansfield sandstone	2	NO	YES	YES	NO	NO	NO	NO	NO	NO	NO					50	50	8										1				1	NO	NO	YES	NO
YES	NO	NO	Searle, D. E., et al. (2000). The effects of coal and diesel particulates on the weathering loss of two major building stones in the United Kingdom — A comparative microcatchment study. 9th International Congress on Deterioration and Conservation of Stone. and Searle, D. E. and D. J. Mitchell (2006). "The effect of coal and diesel particulates on the weathering loss of Portland Limestone in an ur…	10.1016/j.scitotenv.2006.07.005	2000		YES	NO	YES	NO	NO	NO	Portland limestone, Hollington sandstone	2	NO	YES	NO	NO	NO	NO	NO	NO	NO	NO					200	200	45										1			application of artificial PM layers	4	NO	NO	YES	NO
YES	NO	NO	Recheis, A., et al. (2000). Ultrasonic measurements on weathering Alpine marble: a study on field exposed samples and on the Medieval marble portals of Schloss Tirol/South Tyrol-Italy. 9th International Congress on Deterioration and Conservation of Stone. And Bidner, T., et al. (2002). Stone as sensor material for weathering. Proceedings of the International Conference Stone Weathering and Atmosp…		2002		NO	NO	YES	YES	NO	NO	Baumberg sandstone, Obernkirchen sandstone, Laas marble, Sterzing marble	4	YES	NO	NO	NO	NO	NO	NO	NO	NO	NO					50	50	10										1					NO	NO	YES	NO
YES	NO	NO	Maravelaki-Kalaitzaki, P., et al. (2002). "Evaluation of the initial weathering rate of Istria stone exposed to rain action, in Venice, with X-ray photoelectron spectroscopy." Journal of Cultural Heritage 3(4): 273-282.	10.1016/S1296-2074(02)01236-0	2002		YES	NO	NO	NO	NO	NO	Istria stone	1	YES	YES	YES	NO	NO	NO	NO	NO	NO	NO					50	50	50										1		washing in sonication bath		5	NO	NO	YES	NO
YES	NO	NO	Prikryl, R. and I. Dudkova (2002). Experience with long term experimental exposure of building stones: a 70 years study in Czech Republic. Proceedings of the International Conference Stone Weathering and Atmospheric Pollution Network (SWAPNET 2001).		2002		YES	NO	YES	NO	YES	YES	Pozary diorite, Lipnice granite, Fryvaldov granodiorite, Slivenec limestone, Horice sandstone	5	YES	NO	NO	NO	NO	NO	NO	NO	NO	NO					50	50	50										1				250	NO	NO	YES	NO
YES	NO	NO	Slížková, S. (2002). Exposure trials of natural sensor materials for a use in future environmental monitoring of St. Vitus Cathedral in Prague (Czech Republic). International Conf. Stone Weather. Atmos. Pollut. Netw. (SWAPNET 2001).		2002		YES	NO	YES	NO	NO	NO	Horice sandstone, Msene "Prague" sandstone, Zamel sandstone, Predni Kopanina marlstone	4	YES	NO	NO	NO	NO	NO	NO	NO	NO	NO					40	40	40	40	40	10							2					YES	NO	YES	NO
YES	NO	NO	Wilkins, S. J., et al. (2002). "A New Technique to Evaluate and Quantify Modified Solution Kinetics of Calcareous Materials after Sulphuric Acid Pre-Treatment and Urban Exposure." Studies in Conservation 47(2): 88-94.	10.2307/1506848	2002		NO	NO	NO	NO	NO	YES	Calcite crystals	1	YES	NO	NO	NO	NO	NO	NO	NO	NO	NO																	3	1 cm3 crystals		passivation using sulphuric acid		NO	NO	YES	NO
YES	NO	NO	Grossi, C. M., et al. (2003). "Soiling of building stones in urban environments." Building and Environment 38(1): 147-159.		2003		YES	YES	NO	YES	YES	NO	Hontoria limestone, Laspra dolostone, Piedramuelle limestone, Macael marble, Rosa Porrino granite	5	NO	NO	YES	NO	NO	NO	NO	NO	NO	NO					50	50	10										1				12	NO	NO	YES	NO
YES	NO	NO	Turkington, A. V., et al. (2003). "Surface change and decay of sandstone samples exposed to a polluted urban atmosphere over a six-year period: Belfast, Northern Ireland." Building and Environment 38(9–10): 1205-1216.		2003		NO	NO	YES	NO	NO	NO	Baumberger sandstone, Dunhouse sandstone	2	YES	YES	YES	NO	NO	NO	NO	NO	NO	NO					70	50	10										1					YES	NO	YES	NO
YES	NO	NO	Lan, T. T. N., et al. (2005). "The effects of air pollution and climatic factors on atmospheric corrosion of marble under field exposure." Corrosion Science 47(4): 1023-1038.	10.1016/j.corsci.2004.06.013	2005		NO	NO	NO	YES	NO	NO	Unspecified Italian marble	1	NO	YES	YES	NO	NO	NO	NO	NO	NO	NO					20	20	5										1		washing and drying		2	NO	NO	YES	NO
YES	NO	NO	Lefèvre, R.-A., et al. (2007). "Modelling of the calcareous stone sulphation in polluted atmosphere after exposure in the field." Geological Society, London, Special Publications 271(1): 131-137.		2007		YES	NO	NO	NO	NO	NO	Parisian Lutetian limestone, Turonian Richemont limestone	2	NO	YES	YES	NO	NO	NO	NO	NO	NO	NO					100	100	20										1				1	NO	NO	YES	NO
YES	NO	NO	Moses, C. and R. Williams (2008). "Weathering and durability of the Goldsworthy Chalk Stones, South Downs, West Sussex, England." Environmental Geology 56(3-4): 495-506.	10.1007/s00254-008-1377-y	2008		NO	NO	NO	NO	NO	YES	Chalk	1	YES	NO	NO	NO	NO	NO	NO	NO	NO	NO																	1	2m diameter balls	roughly hewn		14	NO	NO	NO	NO
YES	NO	NO	Urosevic, M., et al. (2012). "Black soiling of an architectural limestone during two-year term exposure to urban air in the city of Granada (S Spain)." Sci Total Environ 414: 564-575.	10.1016/j.scitotenv.2011.11.028	2012		YES	NO	NO	NO	NO	NO	Escuzar limestone	1	NO	NO	YES	NO	NO	NO	NO	NO	NO	NO					100	100	20										1					NO	NO	YES	NO
YES	NO	NO	Bonazza, A., et al. (2013). Pollution effects on typical Florentine lithotypes: a multidisciplinary approach. Built Heritage 2013. Monitoring Conservation Management.		2013		NO	NO	YES	YES	NO	NO	Pietra Serena, Pietra Forte, Carrara Marble	3	YES	NO	YES	NO	NO	NO	NO	NO	NO	NO					120	120	30										1				20	YES	NO	YES	NO
YES	NO	NO	Casati, M. (2015). Interactions between atmospheric particulate matter and stone surfaces by means of laboratory and in field studies. PhD School in Chemical Science. Milano, Universita' degli Studi Milano Bicocca. PhD. AND Ferrero, L., et al. (2018). "Chemically and size-resolved particulate matter dry deposition on stone and surrogate surfaces inside and outside the low emission zone of Milan: …		2015		YES	NO	NO	YES	YES	NO	Carrara marble, Botticino limestone, Montorfano granite, Noto stone	4	NO	NO	YES	NO	NO	NO	NO	NO	NO	NO					50	30	10										1		polishing, washing, drying		3	NO	NO	YES	NO
YES	NO	NO	Bellopede, R., et al. (2016). "Ten years of natural ageing of calcareous stones." Engineering Geology 211: 19-26.	10.1016/j.enggeo.2016.06.015	2016	TEAM	YES	NO	NO	YES	NO	NO	Calcareous marbles, dolomitic marbles, limestone	9	YES	NO	NO	NO	NO	NO	NO	NO	NO	NO					500	400	30										1				2	YES	YES	YES	NO
YES	YES	NO	Comite, V., et al. (2017). "Damage monitoring on carbonate stones: Field exposure tests contributing to pollution impact evaluation in two Italian sites." Construction and Building Materials 152(Supplement C): 907-922. AND Bergomi, A., V. Comite, P. Fermo, M. Ricca, M. Borelli, C. M. Belfiore, L. Randazzo, S. A. Ruffolo and M. F. La Russa (2023). "Performance evaluation of a commercial protective…	10.1016/j.conbuildmat.2017.07.048	2017		YES	NO	NO	YES	NO	NO	Carrara marble, Comiso stone, Noto stone	3	YES	NO	YES	YES	NO	NO	NO	NO	NO	NO		Acrylic resin; TiO2 NPs	YES		50	50	20										1				3	NO	NO	YES	NO
YES	NO	YES	Cabello-Briones, C. and H. A. Viles (2017). "Evaluating the Effects of Open Shelters on Limestone Deterioration at Archaeological Sites in Different Climatic Locations." International Journal of Architectural Heritage 11(6): 816-828. and Briones, C. (2016). The effects of open shelters on the preservation of limestone remains at archaeological sites, University of Oxford.	10.1080/15583058.2017.1300710	2017		YES	NO	NO	NO	NO	NO	Portland limestone, Cotswold limestone, Chalk, Globigerina limestone, Coralline limestone	5	YES	YES	YES	NO	NO	NO	NO	NO	NO	NO					90	30	30	50	50	20							2					YES	NO	YES	NO
YES	NO	NO	Cabello-Briones, C. and H. A. Viles (2017). "Evaluating the Effects of Open Shelters on Limestone Deterioration at Archaeological Sites in Different Climatic Locations." International Journal of Architectural Heritage 11(6): 816-828. and Briones, C. (2016). The effects of open shelters on the preservation of limestone remains at archaeological sites, University of Oxford.	10.1080/15583058.2017.1300710	2017		YES	NO	NO	NO	NO	NO	Globigerina limestone, Coralline limestone	2	YES	YES	YES	NO	NO	NO	NO	NO	NO	NO					90	30	30										1					YES	NO	NO	NO
YES	NO	YES	Daly, C. (2016). "The design of a legacy indicator tool for measuring climate change related impacts on built heritage." Heritage Science 4(1). And Daly, C. (2019). "Preliminary results from a legacy indicator tool for measuring climate change related impacts on built heritage." Heritage Science 7(1): 32.	10.1186/s40494-016-0088-z	2016	LegIT	YES	NO	YES	NO	YES	NO	Peakmoor sandstone, Portland limestone, Wiclow granite, Sandstone, Old Red Sandstone	6	YES	YES	NO	NO	NO	NO	NO	NO	NO	NO					50	50	50										1				3	NO	NO	YES	NO
YES	NO	NO	McAllister, D., et al. (2017). "Stone temperature and moisture variability under temperate environmental conditions: Implications for sandstone weathering." Geomorphology 280: 137-152.	10.1016/j.geomorph.2016.12.010	2017		NO	NO	YES	NO	NO	NO	Peakmoor sandstone	1	NO	NO	NO	NO	NO	NO	NO	NO	NO	NO	T and moisture detection				200	100	200										1		sealing sides, insulating sides			NO	NO	YES	NO
YES	NO	NO	Fermo, P., et al. (2018). "Study and Characterization of Environmental Deposition on Marble and Surrogate Substrates at a Monumental Heritage Site." Geosciences 8(9): 349.	10.3390/geosciences8090349	2018		NO	NO	NO	YES	NO	NO	Candoglia marble	1	NO	NO	YES	NO	NO	NO	NO	NO	NO	NO					50	50	20										1		polishing, washing, drying		3	YES	NO	YES	NO
YES	NO	YES	Vidorni, G., et al. (2019). "Air pollution impact on carbonate building stones in Italian urban sites." The European Physical Journal Plus 134(9): 439.	10.1140/epjp/i2019-12943-0	2019		YES	NO	NO	YES	NO	NO	Carrara marble, Nembro limestone	2	NO	NO	YES	NO	NO	NO	NO	NO	NO	NO					120	120	20										1				1	YES	NO	YES	NO
YES	NO	NO	Filho, J. L. E. D., et al. (2020). "Durability of Ornamental Gneiss Stones From Padua, Rio De Janeiro, Brazil." Journal of Materials in Civil Engineering 32(7): 04020176.	10.1061/(ASCE)MT.1943-5533.0003244	2016		NO	NO	NO	NO	NO	YES	Olho do Pombo gneiss, Madeira Rosa gneiss, Madeira Bianca gneiss	3	YES	NO	NO	NO	NO	NO	NO	NO	NO	NO																						NO	YES	YES	NO
YES	NO	NO	Germinario, L., et al. (2022). "Microclimate and Weathering in Cultural Heritage: Design of a Monitoring Apparatus for Field Exposure Tests." Heritage 5(4): 3211-3219.	10.3390/heritage5040165	2022		YES	NO	YES	YES	NO	YES	Botticino, Carrara Marble, Vicenza stone, Euganean Trachyte, Red Verona, Lartios stone, Sfouggaria, Macael marble, Santa Pudia limestone, Tonsberg Latite, Tonsbergite, Istria stone	12	YES	NO	NO	NO	NO	NO	NO	NO	NO	NO					70	70	20										1		polishing		1	NO	NO	YES	NO
YES	NO	NO	Germinario, L., et al. (2022). "Microclimate and Weathering in Cultural Heritage: Design of a Monitoring Apparatus for Field Exposure Tests." Heritage 5(4): 3211-3219.	10.3390/heritage5040165	2022		YES	NO	YES	YES	NO	YES	Botticino, Carrara Marble, Vicenza stone, Euganean Trachyte, Red Verona, Lartios stone, Sfouggaria, Macael marble, Santa Pudia limestone, Tonsberg Latite, Tonsbergite, Istria stone	12	YES	NO	NO	NO	NO	NO	NO	NO	NO	NO					70	70	20										1		polishing		1	NO	NO	YES	NO
YES	NO	NO	Meierding, T. C. (1981). "Marble tombstone weathering rates: a transect of the United States." Physical Geography 2(1): 1-18.	10.1080/02723646.1981.10642201	1981		NO	NO	NO	YES	NO	NO	Vermont marble	1	NO	YES	NO	NO	NO	NO	NO	NO	NO	NO																						NO	NO	NO	NO
YES	NO	NO	Dragovich, D. (1991). "Marble weathering in an industrial environment, eastern Australia." Environmental Geology and Water Sciences 17(2): 127-132.	10.1007/BF01701568	1991		NO	NO	NO	YES	NO	NO		1	NO	YES	NO	NO	NO	NO	NO	NO	NO	NO																						NO	NO	NO	NO
YES	NO	NO	Cooke, R. U., et al. (1995). "Using gravestones to assess changing rates of weathering in the United Kingdom." Earth Surface Processes and Landforms 20: 531-546.		1995		NO	NO	NO	YES	NO	NO		1	NO	YES	NO	NO	NO	NO	NO	NO	NO	NO																						NO	NO	NO	NO
YES	NO	NO	Roberts, S. M. (2005). Surface-recession weathering of marble tombstones: New field data and constraints. Stone Decay in the Architectural Environment. A. V. Turkington, Geological Society of America. 390: 0.	10.1130/0-8137-2390-6.27	2005		NO	NO	NO	YES	NO	NO		1	NO	YES	NO	NO	NO	NO	NO	NO	NO	NO																						NO	NO	NO	NO
YES	NO	NO	Inkpen, R. J. and J. Jackson (2000). "Contrasting weathering rates in coastal, urban and rural areas in Southern Britain: preliminary investigations using gravestones." Earth Surface Processes and Landforms 25: 229-238.		2000		NO	NO	NO	YES	NO	NO		1	NO	YES	NO	NO	NO	NO	NO	NO	NO	NO																						NO	NO	NO	NO
YES	NO	NO	Thornbush, M. J. and S. E. Thornbush (2013). "The application of a limestone weathering index at churchyards in central Oxford, UK." Applied Geography 42: 157-164.	10.1016/j.apgeog.2013.03.001	2013		YES	NO	NO	NO	NO	NO		1	NO	YES	NO	NO	NO	NO	NO	NO	NO	NO																						NO	NO	NO	NO
YES	NO	NO	Wells, T., et al. (2008). "Weathering rates of sandstone in a semi-arid environment (Hunter Valley, Australia)." Environmental Geology 54: 1047-1057.	10.1007/s00254-007-0871-y	2008		NO	NO	YES	NO	NO	NO		1	NO	YES	NO	NO	NO	NO	NO	NO	NO	NO																						NO	YES	NO	NO
YES	NO	NO	Mooers, H. D., et al. (2016). "A 120-year record of the spatial and temporal distribution of gravestone decay and acid deposition." Atmospheric Environment 127: 139-154. and Mooers, H. D., et al. (2017). "Correlation of gravestone decay and air quality 1960–2010." Atmospheric Environment 152: 156-171.	10.1016/j.atmosenv.2015.12.023	2016		NO	NO	NO	YES	NO	NO		1	NO	YES	NO	NO	NO	NO	NO	NO	NO	NO																						NO	NO	NO	NO
YES	NO	NO	Ogrizek, M., A. Gregorič, M. Ivančič, D. Contini, U. Skube, K. Vidović, M. Bele, M. Šala, M. K. Gunde, M. Rigler, E. Menart and A. Kroflič (2023). "Characterization of fresh PM deposits on calcareous stone surfaces: Seasonality, source apportionment and soiling potential." Science of The Total Environment 856: 159012.	10.1016/j.scitotenv.2022.159012	2023		YES	YES	NO	NO	NO	NO		2	NO	NO	YES	NO	NO	NO	NO	NO	NO	NO					50	50	15										1		polishing		1	YES	NO	YES	NO
YES	NO	NO	Klein, M. (1984). "Weathering rates of limestone tombstones measured in Haifa, Israel." Zeitschrift fur Geomorphologie 28(1): 105-111.		several		YES	YES	NO	NO	NO	NO		2	NO	YES	NO	NO	NO	NO	NO	NO	NO	NO																						NO	NO	NO	NO
YES	NO	YES	Zaccariello, G., E. Tesser, R. Piovesan and F. Antonelli (2024). "The (Building) Stones of Venice under Threat: A Study about Their Deterioration between Climate Change and Land Subsidence." Sustainability 16(11): 4701.	10.3390/su16114701	2024		YES	NO	NO	YES	NO	NO	Carrara Marble, Vicenza stone, Red Verona, Istrian stone, Aurisina stone	5	YES	NO	NO	NO	NO	NO	NO	YES	NO	NO	Damage Index				50	50	20										1				1	NO	NO	NO	NO
YES	NO	NO	Reports No 1; 2; 4; 91; Annex 79; 84; 91		several	ICP	YES	NO	YES	NO	NO	NO	Portland limestone, Mansfield sandstone	2	NO	YES	YES	NO	NO	NO	NO	NO	NO	NO	Damage functions; Improved methods	NO	NO		50	50	8												Washing; drying	NA	3	YES	NO	YES	NO
YES	NO	NO	Report No 91: B Annex A1 Description of test sites.		several	ICP	YES	NO	NO	NO	NO	NO	Portland limestone, Mansfield sandstone	1	NO	YES	YES	NO	NO	NO	NO	NO	NO	NO	Damage functions; Improved methods	NO	NO		50	50	8												Washing; drying	NA	3	YES	NO	YES	NO
YES	NO	NO	Report No 91: B Annex A1 Description of test sites; Report No 95;		several	ICP	YES	NO	NO	YES	NO	NO	Portland limestone	2	NO	YES	YES	NO	NO	NO	NO	NO	NO	NO	Damage functions; Soiling Improved methods	NO	NO		50	50	8	6	6	1							2		Washing; drying	NA	1-3	YES	NO	YES	NO
YES	NO	NO	Reports No 1; 2; 4; 91; Annex 79; 84; 91		several	ICP	YES	NO	YES	NO	NO	NO	Portland limestone, Mansfield sandstone	2	NO	YES	YES	NO	NO	NO	NO	NO	NO	NO	Damage functions; Improved methods	NO	NO		50	50	8												Washing; drying	NA	3	YES	NO	YES	NO
YES	NO	NO	Reports No 1; 2; 4; 91; Annex 79; 84; 91		several	ICP	YES	NO	YES	YES	NO	NO	Portland limestone, Mansfield sandstone	3	NO	YES	YES	NO	NO	NO	NO	NO	NO	NO	Damage functions; Soiling Improved methods	NO	NO		50	50	8	6	6	1							2		Washing; drying	NA	1-3	YES	NO	YES	NO
YES	NO	NO	Reports No 1; 2; 4; 91; Annex 79; 84; 91		several	ICP	YES	NO	YES	NO	NO	NO	Portland limestone, Mansfield sandstone	2	NO	YES	YES	NO	NO	NO	NO	NO	NO	NO	Damage functions; Improved methods	NO	NO		50	50	8												Washing; drying	NA	3	YES	NO	YES	NO
YES	NO	NO	Reports No 1; 2; 4; 91; Annex 79; 84; 91		several	ICP	YES	NO	YES	NO	NO	NO	Portland limestone, Mansfield sandstone	2	NO	YES	YES	NO	NO	NO	NO	NO	NO	NO	Damage functions; Improved methods	NO	NO		50	50	8												Washing; drying	NA	3	YES	NO	YES	NO
YES	NO	NO	Reports No 1; 2; 4; 91; Annex 79; 84; 91		several	ICP	YES	NO	YES	NO	NO	NO	Portland limestone, Mansfield sandstone	2	NO	YES	YES	NO	NO	NO	NO	NO	NO	NO	Damage functions; Improved methods	NO	NO		50	50	8												Washing; drying	NA	3	YES	NO	YES	NO
YES	NO	NO	Report No 79; 91; 95; Annex 79; 84; 91;		several	ICP	YES	NO	NO	YES	NO	NO	Portland limestone	2	NO	YES	YES	NO	NO	NO	NO	NO	NO	NO	Damage functions; Soiling Improved methods	NO	NO		50	50	8	6	6	1							2		Washing; drying	NA	1-3	YES	NO	YES	NO
YES	NO	NO	Reports No 1; 2; 4; 91; Annex 79; 84; 91		several	ICP	YES	NO	YES	NO	NO	NO	Portland limestone, Mansfield sandstone	2	NO	YES	YES	NO	NO	NO	NO	NO	NO	NO	Damage functions; Improved methods	NO	NO		50	50	8												Washing; drying	NA	3	YES	NO	YES	NO
YES	NO	NO	Reports No 1; 2; 4; 91; Annex 79; 84; 91		several	ICP	YES	NO	YES	NO	NO	NO	Portland limestone, Mansfield sandstone	2	NO	YES	YES	NO	NO	NO	NO	NO	NO	NO	Damage functions; Improved methods	NO	NO		50	50	8												Washing; drying	NA	3	YES	NO	YES	NO
YES	NO	NO	Reports No 1; 2; 4; 91; Annex 79; 84; 91		several	ICP	YES	NO	YES	NO	NO	NO	Portland limestone, Mansfield sandstone	2	NO	YES	YES	NO	NO	NO	NO	NO	NO	NO	Damage functions; Improved methods	NO	NO		50	50	8												Washing; drying	NA	3	YES	NO	YES	NO
YES	NO	NO	Reports No 1; 2; 4; 91; Annex 79; 84; 91		several	ICP	YES	NO	YES	YES	NO	NO	Portland limestone, Mansfield sandstone	3	NO	YES	YES	NO	NO	NO	NO	NO	NO	NO	Damage functions; Soiling Improved methods	NO	NO		50	50	8	6	6	1							2		Washing; drying	NA	1-3	YES	NO	YES	NO
YES	NO	NO	Reports No 1; 2; 4; 91; Annex 79; 84; 91		several	ICP	YES	NO	YES	NO	NO	NO	Portland limestone, Mansfield sandstone	2	NO	YES	YES	NO	NO	NO	NO	NO	NO	NO	Damage functions; Improved methods	NO	NO		50	50	8												Washing; drying	NA	3	YES	NO	YES	NO
YES	NO	NO	Reports No 1; 2; 4; 91; Annex 79; 84; 91		several	ICP	YES	NO	YES	NO	NO	NO	Portland limestone, Mansfield sandstone	2	NO	YES	YES	NO	NO	NO	NO	NO	NO	NO	Damage functions; Improved methods	NO	NO		50	50	8												Washing; drying	NA	3	YES	NO	YES	NO
YES	NO	NO	Report No 91; 95; Annex 79; 84; 91		several	ICP	YES	NO	NO	YES	NO	NO	Portland limestone	2	NO	YES	YES	NO	NO	NO	NO	NO	NO	NO	Damage functions; Soiling Improved methods	NO	NO		50	50	8	6	6	1							2		Washing; drying	NA	1-3	YES	NO	YES	NO
YES	NO	NO	Reports No 1; 2; 4; 91; Annex 79; 84; 91		several	ICP	YES	NO	YES	YES	NO	NO	Portland limestone, Mansfield sandstone	3	NO	YES	YES	NO	NO	NO	NO	NO	NO	NO	Damage functions; Soiling Improved methods	NO	NO		50	50	8	6	6	1							2		Washing; drying	NA	1-3	YES	NO	YES	NO
YES	NO	NO	Reports No 1; 2; 4; 91; Annex 79; 84; 91		several	ICP	YES	NO	YES	YES	NO	NO	Portland limestone, Mansfield sandstone	3	NO	YES	YES	NO	NO	NO	NO	NO	NO	NO	Damage functions; Soiling Improved methods	NO	NO		50	50	8	6	6	1							2		Washing; drying	NA	1-3	YES	NO	YES	NO
YES	NO	NO	Reports No 1; 2; 4; 91; Annex 79; 84; 91		several	ICP	YES	NO	YES	YES	NO	NO	Portland limestone, Mansfield sandstone	3	NO	YES	YES	NO	NO	NO	NO	NO	NO	NO	Damage functions; Soiling Improved methods	NO	NO		50	50	8	6	6	1							2		Washing; drying	NA	1-3	YES	NO	YES	NO
YES	NO	NO	Reports No 1; 2; 4; 91; Annex 79; 84; 91		several	ICP	YES	NO	YES	YES	NO	NO	Portland limestone, Mansfield sandstone	3	NO	YES	YES	NO	NO	NO	NO	NO	NO	NO	Damage functions; Soiling Improved methods	NO	NO		50	50	8	6	6	1							2		Washing; drying	NA	1-3	YES	NO	YES	NO
YES	NO	NO	Reports No 1; 2; 4; 91; Annex 79; 84; 91		several	ICP	YES	NO	YES	NO	NO	NO	Portland limestone, Mansfield sandstone	2	NO	YES	YES	NO	NO	NO	NO	NO	NO	NO	Damage functions; Improved methods	NO	NO		50	50	8												Washing; drying	NA	3	YES	NO	YES	NO
YES	NO	NO	Reports No 1; 2; 4; 91; Annex 79; 84; 91		several	ICP	YES	NO	YES	NO	NO	NO	Portland limestone, Mansfield sandstone	2	NO	YES	YES	NO	NO	NO	NO	NO	NO	NO	Damage functions; Improved methods	NO	NO		50	50	8												Washing; drying	NA	3	YES	NO	YES	NO
YES	NO	NO	Reports No 1; 2; 4; 91; Annex 79; 84; 91		several	ICP	YES	NO	YES	NO	NO	NO	Portland limestone, Mansfield sandstone	2	NO	YES	YES	NO	NO	NO	NO	NO	NO	NO	Damage functions; Improved methods	NO	NO		50	50	8												Washing; drying	NA	3	YES	NO	YES	NO
YES	NO	NO	Reports No 1; 2; 4; 91; Annex 79; 84; 91		several	ICP	YES	NO	YES	NO	NO	NO	Portland limestone, Mansfield sandstone	2	NO	YES	YES	NO	NO	NO	NO	NO	NO	NO	Damage functions; Improved methods	NO	NO		50	50	8												Washing; drying	NA	3	YES	NO	YES	NO
YES	NO	NO	Reports No 1; 2; 4; 91; Annex 79; 84; 91		several	ICP	YES	NO	YES	YES	NO	NO	Portland limestone, Mansfield sandstone	3	NO	YES	YES	NO	NO	NO	NO	NO	NO	NO	Damage functions; Soiling Improved methods	NO	NO		50	50	8	6	6	1							2		Washing; drying	NA	1-3	YES	NO	YES	NO
YES	NO	NO	Reports No 1; 2; 4; 91; Annex 79; 84; 91		several	ICP	YES	NO	YES	NO	NO	NO	Portland limestone, Mansfield sandstone	2	NO	YES	YES	NO	NO	NO	NO	NO	NO	NO	Damage functions; Improved methods	NO	NO		50	50	8												Washing; drying	NA	3	YES	NO	YES	NO
YES	NO	NO	Reports No 1; 2; 4; 91; Annex 79; 84; 91		several	ICP	YES	NO	YES	YES	NO	NO	Portland limestone, Mansfield sandstone	3	NO	YES	YES	NO	NO	NO	NO	NO	NO	NO	Damage functions; Soiling Improved methods	NO	NO		50	50	8	6	6	1							2		Washing; drying	NA	1-3	YES	NO	YES	NO
YES	NO	NO	Report No 91; 95; Annex 79; 84; 91		several	ICP	YES	NO	NO	YES	NO	NO	Portland limestone	2	NO	YES	YES	NO	NO	NO	NO	NO	NO	NO	Damage functions; Soiling Improved methods	NO	NO		50	50	8	6	6	1							2		Washing; drying	NA	1-3	YES	NO	YES	NO
YES	NO	NO	Reports No 1; 2; 4; 91; Annex 79; 84; 91		several	ICP	YES	NO	YES	YES	NO	NO	Portland limestone, Mansfield sandstone	3	NO	YES	YES	NO	NO	NO	NO	NO	NO	NO	Damage functions; Improved methods	NO	NO		50	50	8	6	6	1							2		Washing; drying	NA	1-3	YES	NO	YES	NO
YES	NO	NO	Reports No 1; 2; 4; 91; Annex 79; 84; 91		several	ICP	YES	NO	YES	NO	NO	NO	Portland limestone, Mansfield sandstone	2	NO	YES	YES	NO	NO	NO	NO	NO	NO	NO	Damage functions; Improved methods	NO	NO		50	50	8												Washing; drying	NA	3	YES	NO	YES	NO
YES	NO	NO	Reports No 1; 2; 4; 91; Annex 79; 84; 91		several	ICP	YES	NO	YES	YES	NO	NO	Portland limestone, Mansfield sandstone	3	NO	YES	YES	NO	NO	NO	NO	NO	NO	NO	Damage functions; Soiling Improved methods	NO	NO		50	50	8	6	6	1							2		Washing; drying	NA	1-3	YES	NO	YES	NO
YES	NO	NO	Reports No 1; 2; 4; 91; Annex 79; 84; 91		several	ICP	YES	NO	YES	NO	NO	NO	Portland limestone, Mansfield sandstone	2	NO	YES	YES	NO	NO	NO	NO	NO	NO	NO	Damage functions; Improved methods	NO	NO		50	50	8												Washing; drying	NA	3	YES	NO	YES	NO
YES	NO	NO	Reports No 1; 2; 4; 91; Annex 79; 84; 91		several	ICP	YES	NO	YES	NO	NO	NO	Portland limestone, Mansfield sandstone	2	NO	YES	YES	NO	NO	NO	NO	NO	NO	NO	Damage functions; Improved methods	NO	NO		50	50	8												Washing; drying	NA	3	YES	NO	YES	NO
YES	NO	NO	Reports No 1; 2; 4; 91; Annex 79; 84; 91		several	ICP	YES	NO	YES	NO	NO	NO	Portland limestone, Mansfield sandstone	2	NO	YES	YES	NO	NO	NO	NO	NO	NO	NO	Damage functions; Improved methods	NO	NO		50	50	8												Washing; drying	NA	3	YES	NO	YES	NO
YES	NO	NO	Reports No 1; 2; 4; 91; Annex 79; 84; 91		several	ICP	YES	NO	YES	NO	NO	NO	Portland limestone, Mansfield sandstone	2	NO	YES	YES	NO	NO	NO	NO	NO	NO	NO	Damage functions; Improved methods	NO	NO		50	50	8												Washing; drying	NA	3	YES	NO	YES	NO
YES	NO	NO	Report No 91; 95; Annex 79; 84; 91		several	ICP	YES	NO	NO	NO	NO	NO	Portland limestone	1	NO	YES	YES	NO	NO	NO	NO	NO	NO	NO	Damage functions; Improved methods	NO	NO		50	50	8												Washing; drying	NA		YES	NO	YES	NO
YES	NO	NO	Reports No 1; 2; 4; 91; Annex 79; 84; 91		several	ICP	YES	NO	YES	YES	NO	NO	Portland limestone, Mansfield sandstone	3	NO	YES	YES	NO	NO	NO	NO	NO	NO	NO	Damage functions; Soiling Improved methods	NO	NO		50	50	8	6	6	1							2		Washing; drying	NA	1-3	YES	NO	YES	NO
YES	NO	NO	Reports No 1; 2; 4; 91; Annex 79; 84; 91		several	ICP	YES	NO	YES	NO	NO	NO	Portland limestone, Mansfield sandstone	2	NO	YES	YES	NO	NO	NO	NO	NO	NO	NO	Damage functions; Improved methods	NO	NO		50	50	8												Washing; drying	NA	3	YES	NO	YES	NO
YES	NO	NO	Reports No 1; 2; 4; 91; Annex 79; 84; 91		several	ICP	YES	NO	YES	YES	NO	NO	Portland limestone, Mansfield sandstone	3	NO	YES	YES	NO	NO	NO	NO	NO	NO	NO	Damage functions; Soiling Improved methods	NO	NO		50	50	8	6	6	1							2		Washing; drying	NA	1-3	YES	NO	YES	NO
YES	NO	NO	Reports No 1; 2; 4; 91; Annex 79; 84; 91		several	ICP	YES	NO	YES	NO	NO	NO	Portland limestone, Mansfield sandstone	2	NO	YES	YES	NO	NO	NO	NO	NO	NO	NO	Damage functions; Improved methods	NO	NO		50	50	8												Washing; drying	NA	3	YES	NO	YES	NO
YES	NO	NO			several	ICP	YES	NO	NO	NO	NO	NO	Portland limestone	1	NO	YES	YES	NO	NO	NO	NO	NO	NO	NO	Damage functions; Improved methods	NO	NO		50	50	8												Washing; drying	NA	3	YES	NO	YES	NO
YES	NO	NO	Report 84; 91; 91; Annex 79; 91		several	ICP	YES	NO	NO	NO	NO	NO	Portland limestone	1	NO	YES	YES	NO	NO	NO	NO	NO	NO	NO	Damage functions; Improved methods	NO	NO		50	50	8												Washing; drying	NA	3	YES	NO	YES	NO
YES	NO	NO	Reports No 1; 2; 4; 91; Annex 79; 84; 91		several	ICP	YES	NO	YES	NO	NO	NO	Portland limestone, Mansfield sandstone	2	NO	YES	YES	NO	NO	NO	NO	NO	NO	NO	Damage functions; Improved methods	NO	NO		50	50	8												Washing; drying	NA	3	YES	NO	YES	NO
YES	NO	NO	Reports No 1; 2; 4; 91; Annex 79; 84; 91		several	ICP	YES	NO	YES	NO	NO	NO	Portland limestone, Mansfield sandstone	2	NO	YES	YES	NO	NO	NO	NO	NO	NO	NO	Damage functions; Improved methods	NO	NO		50	50	8												Washing; drying	NA	3	YES	NO	YES	NO
YES	NO	NO			several	ICP	YES	NO	NO	NO	NO	NO	Portland limestone	1	NO	YES	YES	NO	NO	NO	NO	NO	NO	NO	Damage functions; Improved methods	NO	NO		50	50	8												Washing; drying	NA	?	YES	NO	YES	NO
YES	NO	NO	Reports No 1; 2; 4; 91; Annex 79; 84; 91		several	ICP	YES	NO	YES	NO	NO	NO	Portland limestone, Mansfield sandstone	2	NO	YES	YES	NO	NO	NO	NO	NO	NO	NO	Damage functions; Improved methods	NO	NO		50	50	8												Washing; drying	NA	3	YES	NO	YES	NO
YES	NO	NO			several	ICP	YES	NO	NO	NO	NO	NO	Portland limestone	1	NO	YES	YES	NO	NO	NO	NO	NO	NO	NO	Damage functions; Improved methods	NO	NO		50	50	8												Washing; drying	NA	?	YES	NO	YES	NO
YES	NO	NO	Reports No 1; 2; 4; 91; Annex 79; 84; 91		several	ICP	YES	NO	YES	NO	NO	NO	Portland limestone, Mansfield sandstone	2	NO	YES	YES	NO	NO	NO	NO	NO	NO	NO	Damage functions; Improved methods	NO	NO		50	50	8												Washing; drying	NA	3	YES	NO	YES	NO
YES	NO	NO	Reports No 1; 2; 4; 91; Annex 79; 84; 91		several	ICP	YES	NO	YES	NO	NO	NO	Portland limestone, Mansfield sandstone	2	NO	YES	YES	NO	NO	NO	NO	NO	NO	NO	Damage functions; Improved methods	NO	NO		50	50	8												Washing; drying	NA	3	YES	NO	YES	NO
YES	NO	NO	Report No 79; 91; 95; Annex 79; 84; 91		several	ICP	YES	NO	NO	YES	NO	NO	Portland limestone	2	NO	YES	YES	NO	NO	NO	NO	NO	NO	NO	Damage functions; Soiling Improved methods	NO	NO		50	50	8	6	6	1							2		Washing; drying	NA	1-3	YES	NO	YES	NO
YES	NO	NO	Reports No 1; 2; 4; 91; Annex 79; 84; 91		several	ICP	YES	NO	NO	NO	NO	NO	Portland limestone	1	NO	YES	YES	NO	NO	NO	NO	NO	NO	NO	Damage functions; Improved methods	NO	NO		50	50	8												Washing; drying	NA	3	YES	NO	YES	NO
YES	NO	NO			several	ICP	YES	NO	NO	NO	NO	NO	Portland limestone	1	NO	YES	YES	NO	NO	NO	NO	NO	NO	NO	Damage functions; Improved methods	NO	NO		50	50	8												Washing; drying	NA	3	YES	NO	YES	NO
YES	NO	NO	Report No 91;Annex 79; 84; 91		several	ICP	YES	NO	NO	NO	NO	NO	Portland limestone	1	NO	YES	YES	NO	NO	NO	NO	NO	NO	NO	Damage functions; Improved methods	NO	NO		50	50	8												Washing; drying	NA	3	YES	NO	NA	NA
YES	NO	NO	Report No 91;Annex 79; 84; 91		several	ICP	YES	NO	NO	YES	NO	NO	Portland limestone	2	NO	YES	YES	NO	NO	NO	NO	NO	NO	NO	Damage functions; Soiling Improved methods	NO	NO		50	50	8	6	6	1							2		Washing; drying	NA	1-3	YES	NO	YES	NO
YES	NO	NO	Annex 79; 84		several	ICP	YES	NO	NO	NO	NO	NO	Portland limestone	1	NO	YES	YES	NO	NO	NO	NO	NO	NO	NO		NO	NO		50	50	8												Washing; drying	NA	NA	YES	NO	NA	NA
YES	NO	NO	Report 91; 95; Annex 79; 84; 91		several	ICP	YES	NO	NO	YES	NO	NO	Portland limestone	2	NO	YES	YES	NO	NO	NO	NO	NO	NO	NO	Damage functions; Soiling Improved methods	NO	NO		50	50	8	6	6	1							2		Washing; drying	NA	1-3	YES	NO	YES	NO
YES	NO	NO	Report No 9; 95; Annex 79; 84; 91		several	ICP	YES	NO	NO	YES	NO	NO	Portland limestone	2	NO	YES	YES	NO	NO	NO	NO	NO	NO	NO	Damage functions; Soiling Improved methods	NO	NO		50	50	8	6	6	1							2		Washing; drying	NA	1-3	YES	NO	YES	NO
YES	NO	NO	Report No 79; 91; 91; Annex 79; 84; 91		several	ICP	YES	NO	NO	NO	NO	NO	Portland limestone	1	NO	YES	YES	NO	NO	NO	NO	NO	NO	NO	Damage functions; Improved methods	NO	NO		50	50	8												Washing; drying	NA	3	YES	NO	YES	NO
YES	NO	NO	Report No 91; 91; Annex 79; 84; 91		several	ICP	YES	NO	NO	YES	NO	NO	Portland limestone	2	NO	YES	YES	NO	NO	NO	NO	NO	NO	NO	Damage functions; Soiling Improved methods	NO	NO		50	50	8	6	6	1							2		Washing; drying	NA	1-3	YES	NO	YES	NO
YES	NO	NO	Report No 91; 91; Annex 79; 84; 91		several	ICP	YES	NO	NO	NO	NO	NO	Portland limestone	1	NO	YES	YES	NO	NO	NO	NO	NO	NO	NO	Damage functions; Improved methods	NO	NO		50	50	8												Washing; drying	NA	3	YES	NO	YES	NO
YES	NO	NO			several	ICP	YES	NO	NO	NO	NO	NO	Portland limestone	1	NO	YES	YES	NO	NO	NO	NO	NO	NO	NO	Damage functions; Improved methods	NO	NO		50	50	8												Washing; drying	NA	3	YES	NO	YES	NO
YES	NO	NO	Report No 79; 91; 95; Annex 79; 84; 91		several	ICP	YES	NO	NO	YES	NO	NO	Portland limestone	2	NO	YES	YES	NO	NO	NO	NO	NO	NO	NO	Damage functions; Soiling Improved methods	NO	NO		50	50	8												Washing; drying	NA	3	YES	NO	YES	NO
YES	NO	NO	Report No 84; 91; Annex 84; 91		several	ICP	YES	NO	NO	YES	NO	NO	Portland limestone	2	NO	YES	YES	NO	NO	NO	NO	NO	NO	NO	Damage functions; Soiling Improved methods	NO	NO		50	50	8												Washing; drying	NA	3	YES	NO	YES	NO
YES	NO	NO	Report No 84; 91; Annex 84; 91		several	ICP	YES	NO	NO	YES	NO	NO	Portland limestone	2	NO	YES	YES	NO	NO	NO	NO	NO	NO	NO	Damage functions; Soiling Improved methods	NO	NO		50	50	8												Washing; drying	NA	3	YES	NO	YES	NO
[truncated: 134 more columns]

## Sheet: List of abbreviation - methods
Abbreviation	Method
AAS/AES	Atomic Absorption/Atomic Emission Spectroscopy
AFM	Atomic Force Microscopy
Color	Chromameter/Colorimetry
CBM	Culture-based Methods (biology)
CHEM	Chemical Methods (wet chemistry)
CHEM-RW	Chemical Analysis of Rain Water/Rain Run-off
DB	Drying Behavior
DRIFT	Diffused Reflectance IR spectroscopy
DRMS	Drilling Resistance Measurement
EDS/WDS	Energy/Wavelength Sispersion Spectroscopy
EDXRF/XRF	X-Ray Fluorescence Spectroscopy
FES	Flame Emission Spectroscopy
FTIR	FTIR Spectroscopy (+ATR)
FTS	Flexural-Tensile Strength
Gloss	Gloss Measurement
IC	Ionic Chromatography
LA-MS	Laser Ablation-Mass Spectroscopy
LAMMS	Laser Ablation Microprobe Mass Spectroscopy
Mass	Mass Variation
MBM	Molecular-based Methods (biology)
MIN	Mineralogical Analysis (TSP)
MIP	Mercury Intrusion Porosimetry
O2	Respiration Measurement (biology)
OM	Optical Microscopy
Photo	Photocatalytic Activity (Rodhamine test)
PRO	Profilometry (laser, stylus, etc.)
Raman	Raman Spectroscopy
SA	Water Sliding Angle
SCA	Static Contact Angle
SEC	Size Exclusion Chromatography
SEM	Scanning Electron Microscopy (+EDX)
SH	Surface Hardness
SM	Stereomicroscopy
SPO	Sponge Test Method
SR	Surface Roughness
SS-NMR	Single-sided Nuclear Magnetic Resonance
Tape	Scotch Tape Peeling Test
TOF-SIMS	Time of Flight - Secondary Ion Mass Spectroscopy
UCS	Uniaxial Compressive Strenght
UPV	Ultrasound Pulse Velocity
VDM	Videomicroscopy/Digital Microscopy
VH	Hardness - Vickers
Visual	Visual Inspection and Photographic Documentation
XPS	X-Ray Photo-electron Spectroscopy
WAC	Capillary Water Absorption Env. Pressure
WDA	Water Drop Absorption Time
WVP	Water Vapour Permeability
